# Supplementary material for: KOAc-promoted alkynylation of α-C–H bonds of ethers with alkynyl bromides under transition-metal-free conditions
Source: Royal Society of Chemistry journal article supplement (doi:10.1039/c4ob00002a), 2014-01-01

Supplementary Material (ESI) for Organic Bioorganic Chemistry  
This journal is (c) The Royal Society of Chemistry 2014

## *Supporting Information*

# **KOAc-promoted alkynylation of $\alpha$ -C–H bonds of ethers with alkynyl bromides under transition-metal-free conditions**

Jiajun Zhang,<sup>a</sup> Pinhua Li,<sup>\*a</sup> and Lei Wang<sup>\*a,b</sup>

<sup>a</sup> Department of Chemistry, Huaibei Normal University, Huaibei, Anhui 235000, P R China

Tel: + 86-561-3802-069 Fax: + 86-561-3090-518 E-mail: leiwang@chnu.edu.cn

<sup>b</sup> State Key Laboratory of Organometallic Chemistry, Shanghai Institute of Organic Chemistry, Chinese Academy of Sciences, Shanghai 200032, P R China

### *Table of Contents for Supporting Information*

|                                                                           |   |
|---------------------------------------------------------------------------|---|
| 1. Effect of base/ligand on the model reaction.....                       | 2 |
| 2. GC-MS of the TEMPO with tetrahydrofuran and phenylethynyl bromide..... | 3 |
| 3. <sup>1</sup> H and <sup>13</sup> C NMR spectra of the products.....    | 4 |

## 1. Effect of base/ligand on the model reaction (TS1)

**Table S1** Effect of base/ligand on the model reaction.<sup>a</sup>

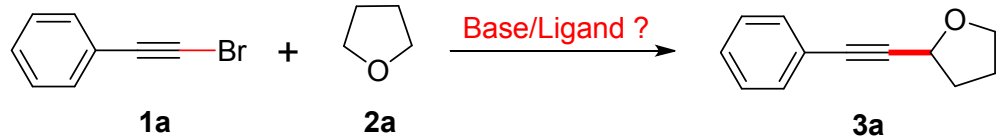

| Entry | Base                | Ligand    | Yield (%) <sup>b</sup> |
|-------|---------------------|-----------|------------------------|
| 1     | KO <sup>t</sup> Bu  | L-Proline | 34                     |
| 2     | KO <sup>t</sup> Bu  | TMEDA     | NR                     |
| 3     | KO <sup>t</sup> Bu  | 1,10-Phen | NR                     |
| 4     | KO <sup>t</sup> Bu  | Bipy      | 29                     |
| 5     | KO <sup>t</sup> Bu  | 8-HQ      | NR                     |
| 6     | KO <sup>t</sup> Bu  | Dppf      | NR                     |
| 7     | NaO <sup>t</sup> Bu | L-Proline | 11                     |
| 8     | NaO <sup>t</sup> Bu | TMEDA     | NR                     |
| 9     | NaO <sup>t</sup> Bu | 1,10-Phen | NR                     |
| 10    | NaO <sup>t</sup> Bu | Bipy      | NR                     |
| 11    | NaO <sup>t</sup> Bu | 8-HQ      | NR                     |
| 12    | NaO <sup>t</sup> Bu | Dppf      | NR                     |
| 13    | LiO <sup>t</sup> Bu | L-Proline | 18                     |
| 14    | LiO <sup>t</sup> Bu | TMEDA     | NR                     |
| 15    | LiO <sup>t</sup> Bu | 1,10-Phen | NR                     |
| 16    | LiO <sup>t</sup> Bu | Bipy      | NR                     |
| 17    | LiO <sup>t</sup> Bu | 8-HQ      | NR                     |
| 18    | LiO <sup>t</sup> Bu | Dppf      | NR                     |

<sup>a</sup> Reaction conditions: **1a** (0.30 mmol), **2a** (2.0 mL, excess), base (0.60 mmol), ligand (0.15 mmol) at 150 °C for 12 h. <sup>b</sup> Isolated yield. TMEDA = *N,N,N',N'*-tetramethylethylenediamine. 1,10-Phen = 1,10-phenanthroline. Bipy = 2,2'-bipyridine. 8-HQ = 8-hydroxyquinoline. Dppf = 1,1'-bis(diphenylphosphino)ferrocene.

## 2. GC-MS of the TEMPO with tetrahydrofuran and phenylethynyl bromide under the standard reaction conditions

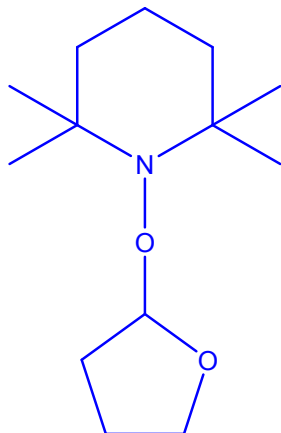

Chemical Formula:  $C_{13}H_{25}NO_2$

$[M+H]^+ = C_{13}H_{26}NO_2$

Exact Mass: 228.20

Molecular Weight: 228.35

m/z: 228.20 (100.0%), 229.20 (14.4%), 230.20 (1.4%)

Elemental Analysis: C, 68.38; H, 11.48; N, 6.13; O, 14.01

### MS Data Review All Plots - 2013-10-29 19:54

File: d:\gc-ms data\chao liu\liu\liu-4\liu-4-193\ld-193-12013-10-6.sms  
 File: d:\gc-ms data\chao liu\liu\liu-4\20131008\lyx-1-1372013-10-8.sms

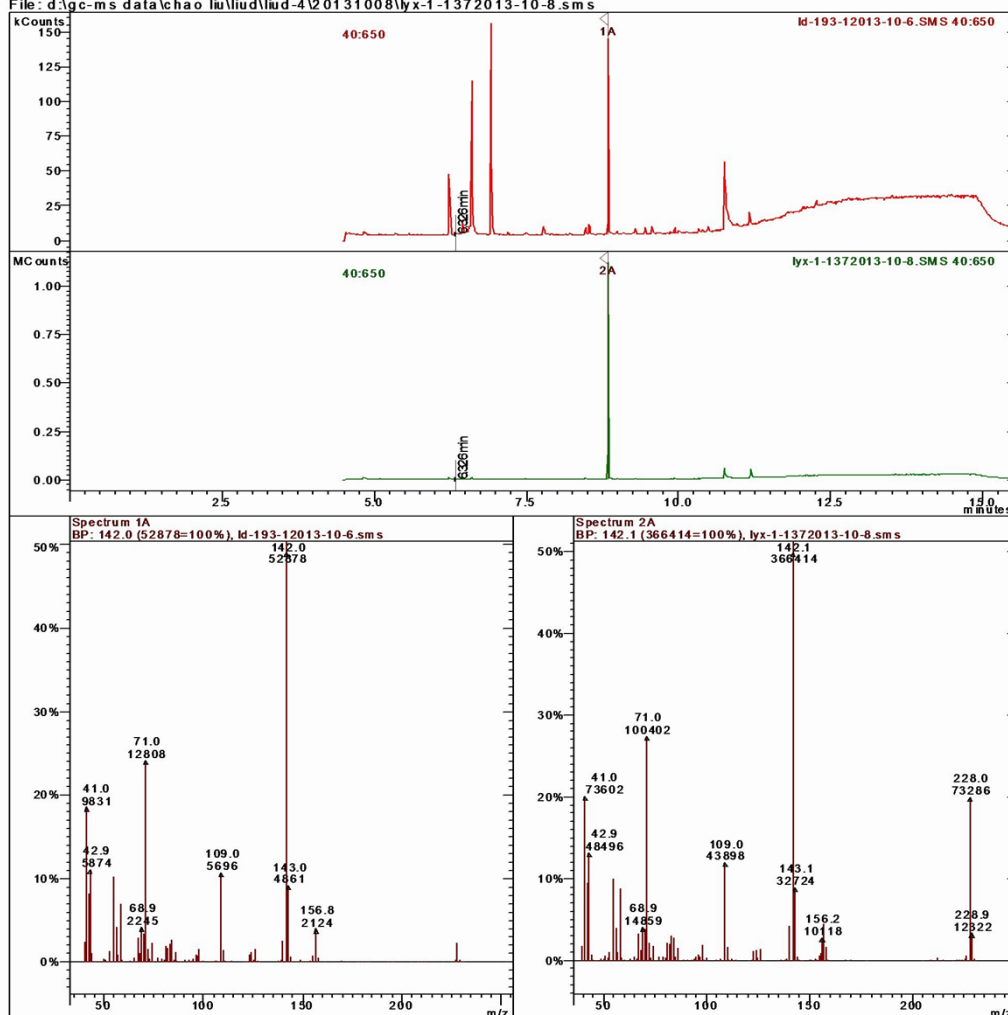

### 3. <sup>1</sup>H NMR and <sup>13</sup>C NMR spectra of the products

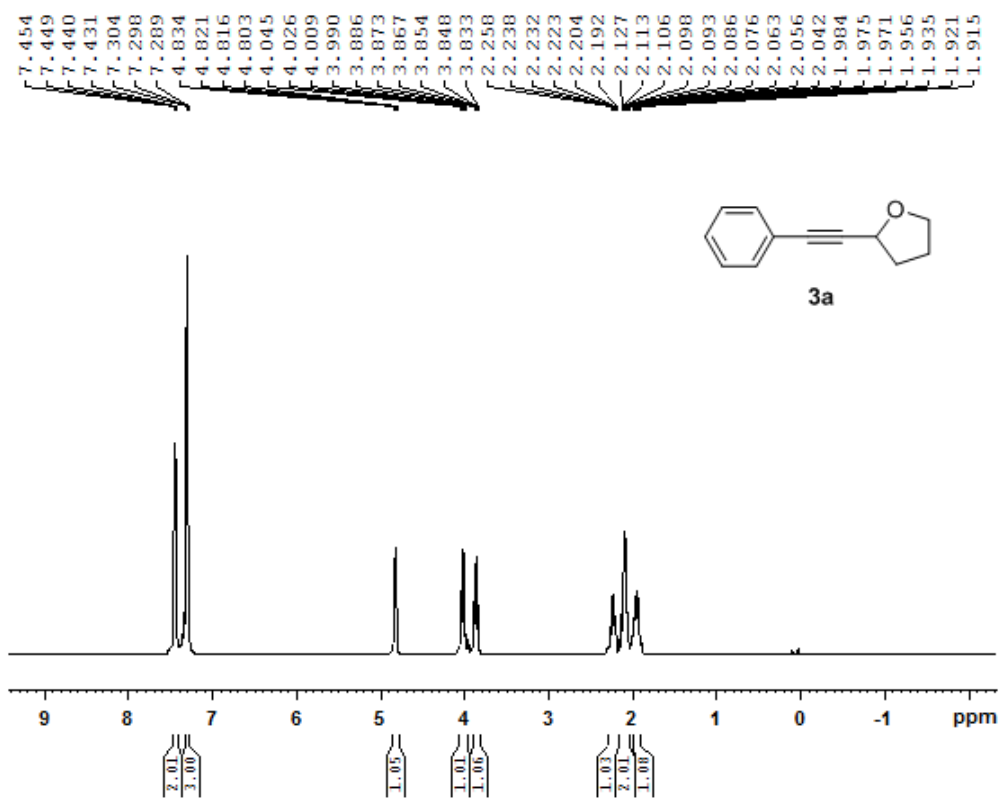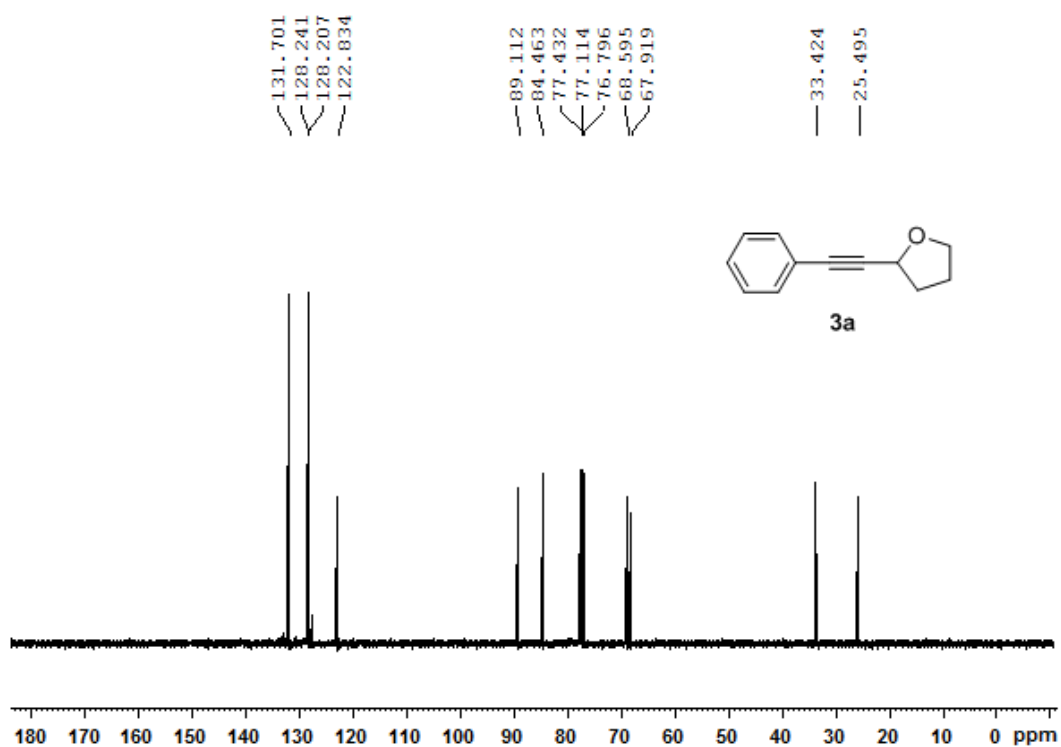

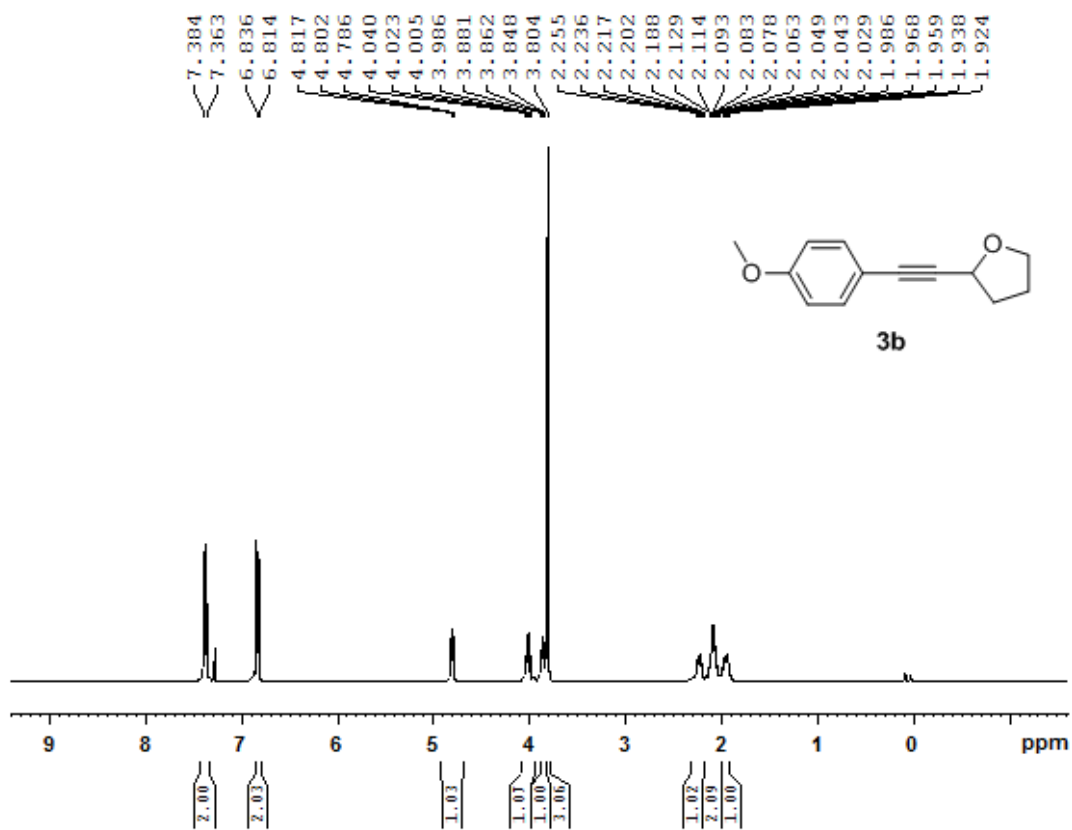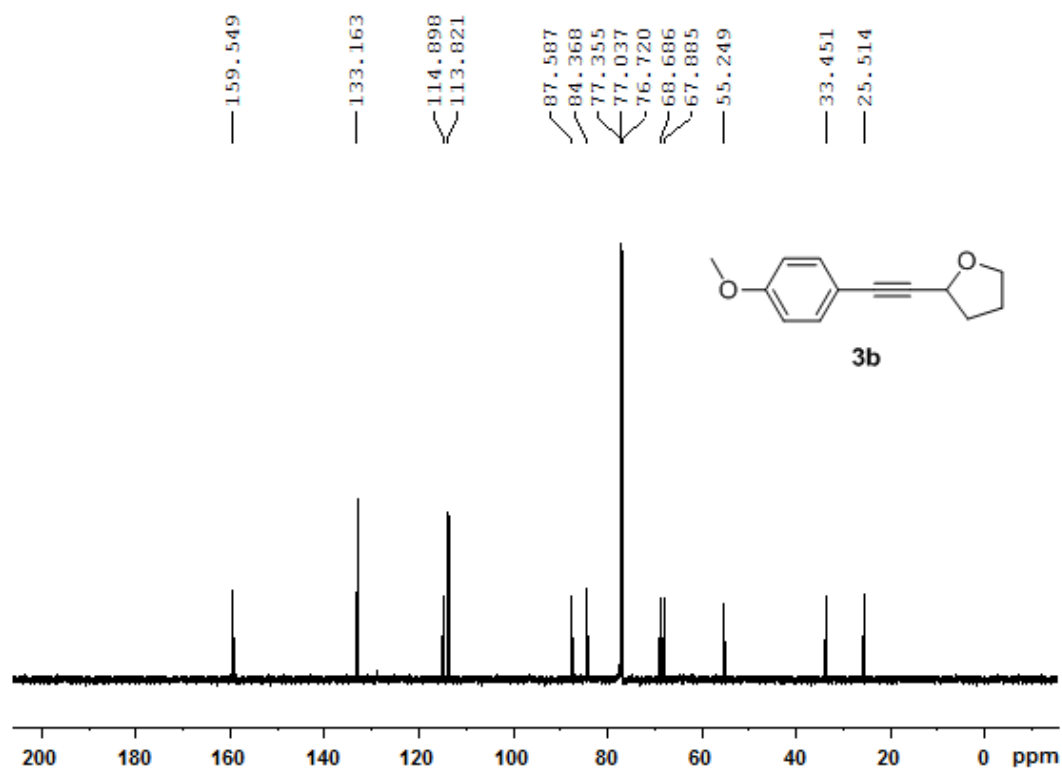

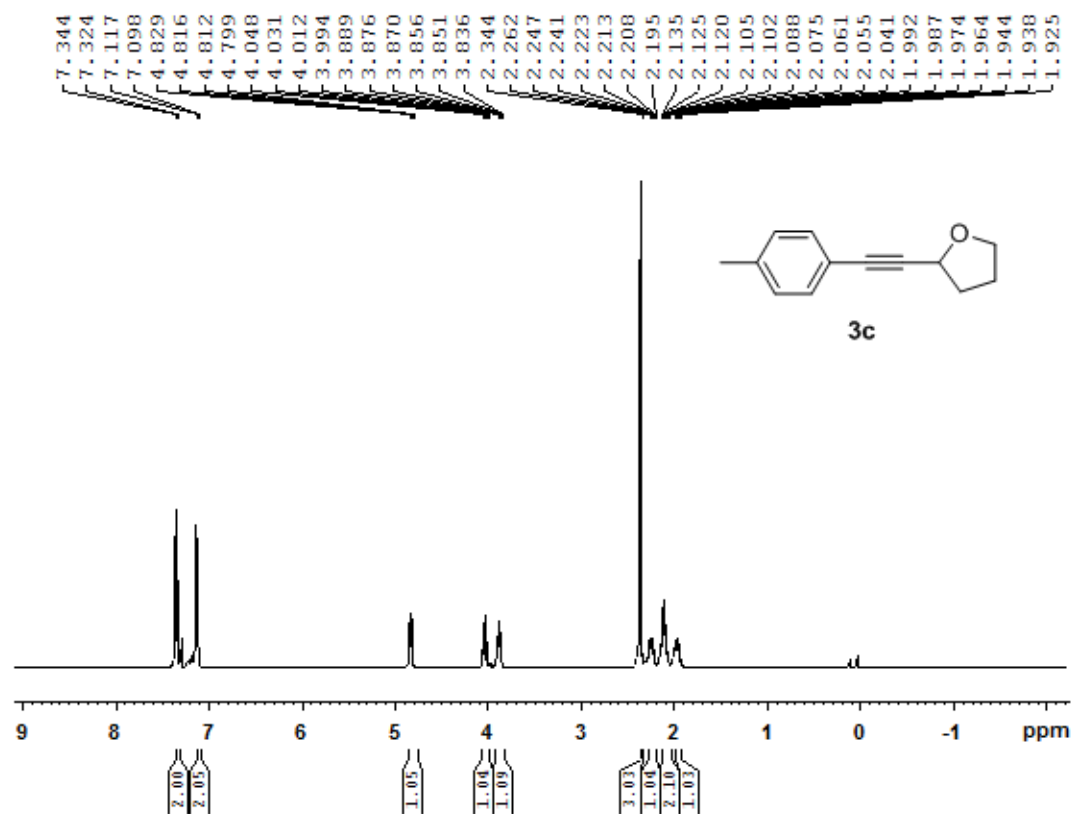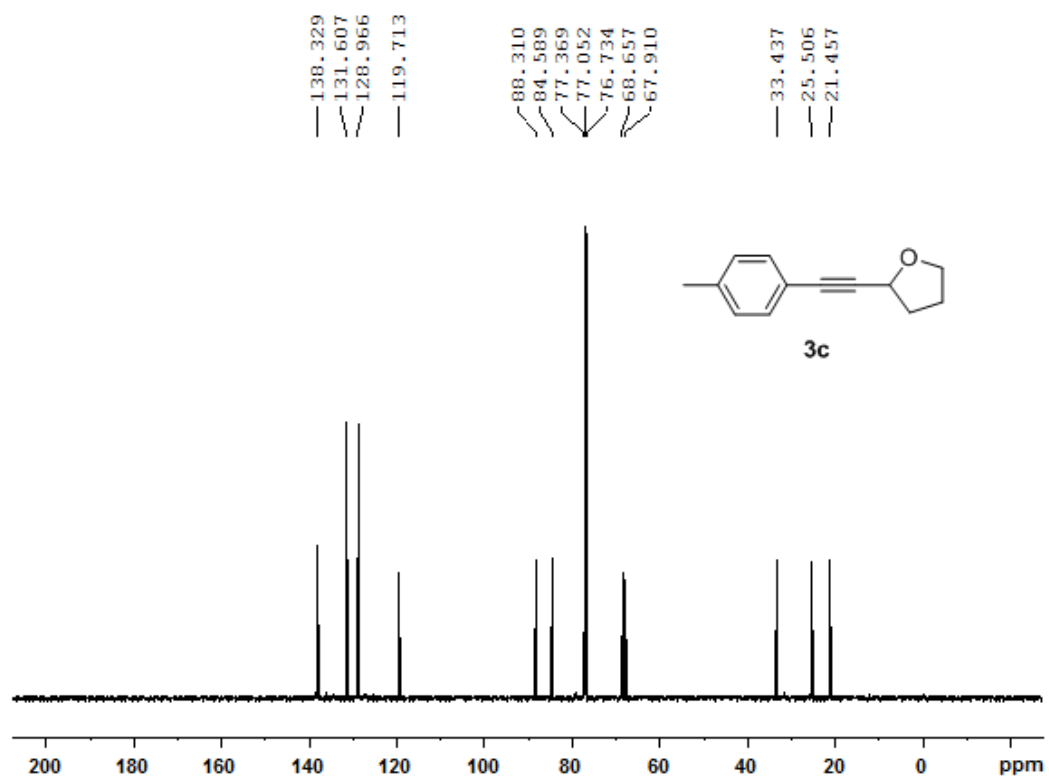

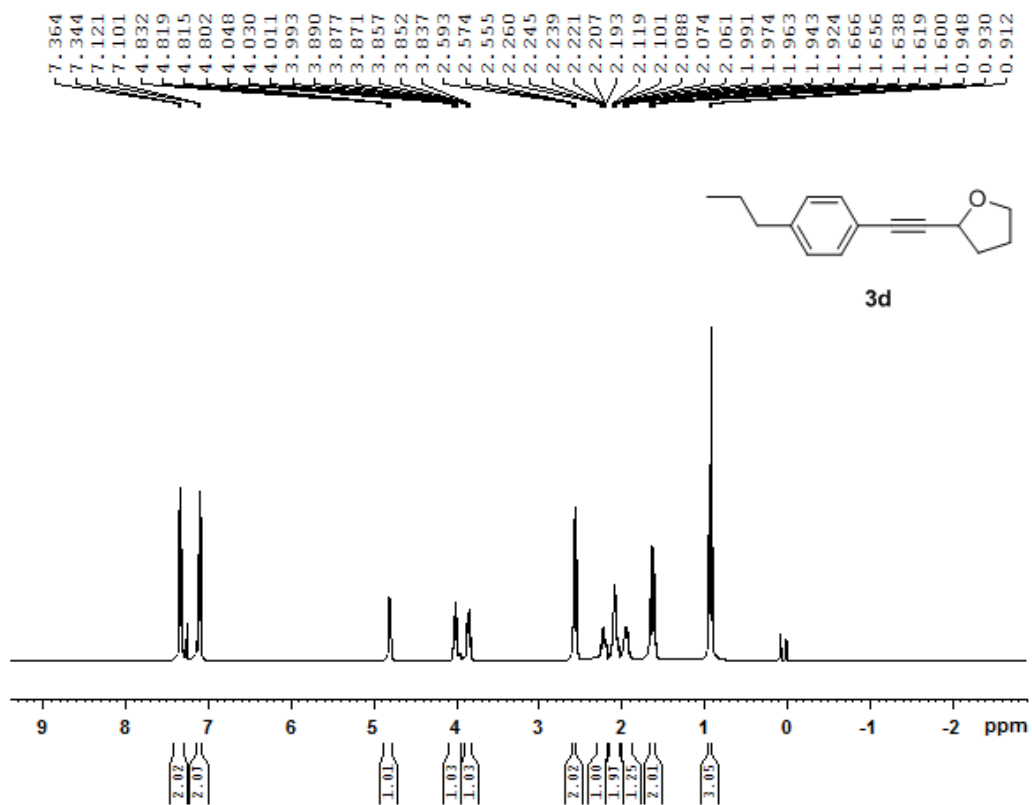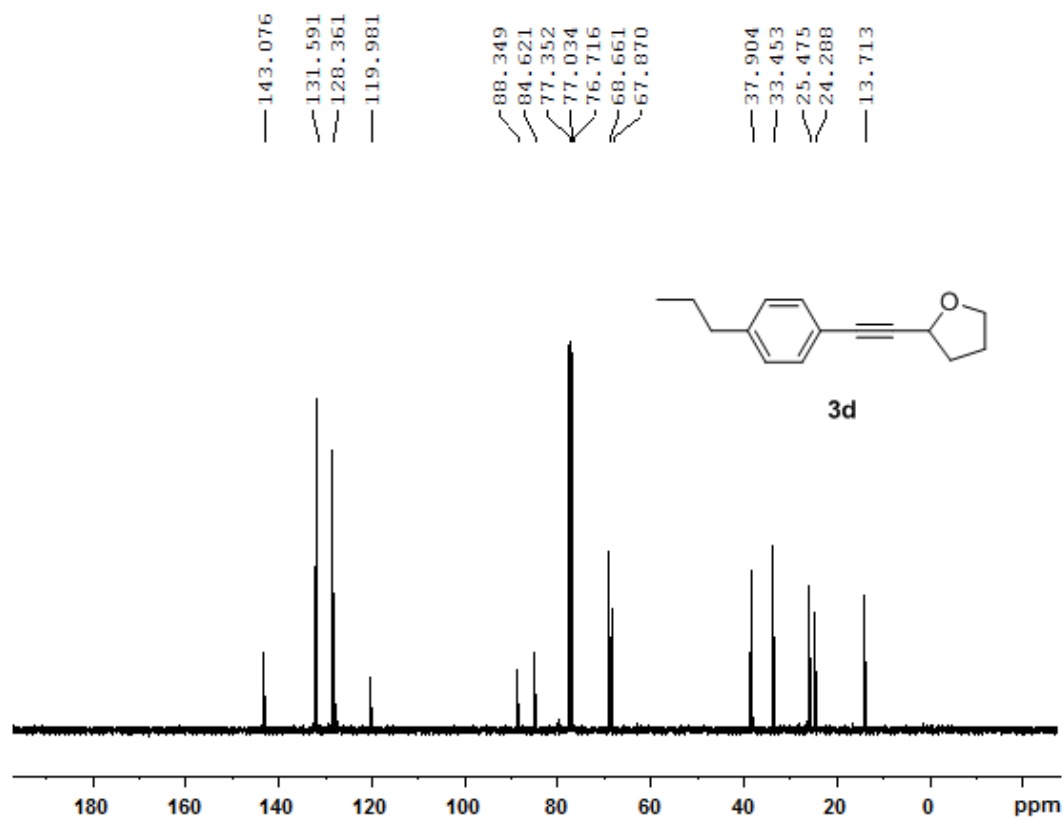

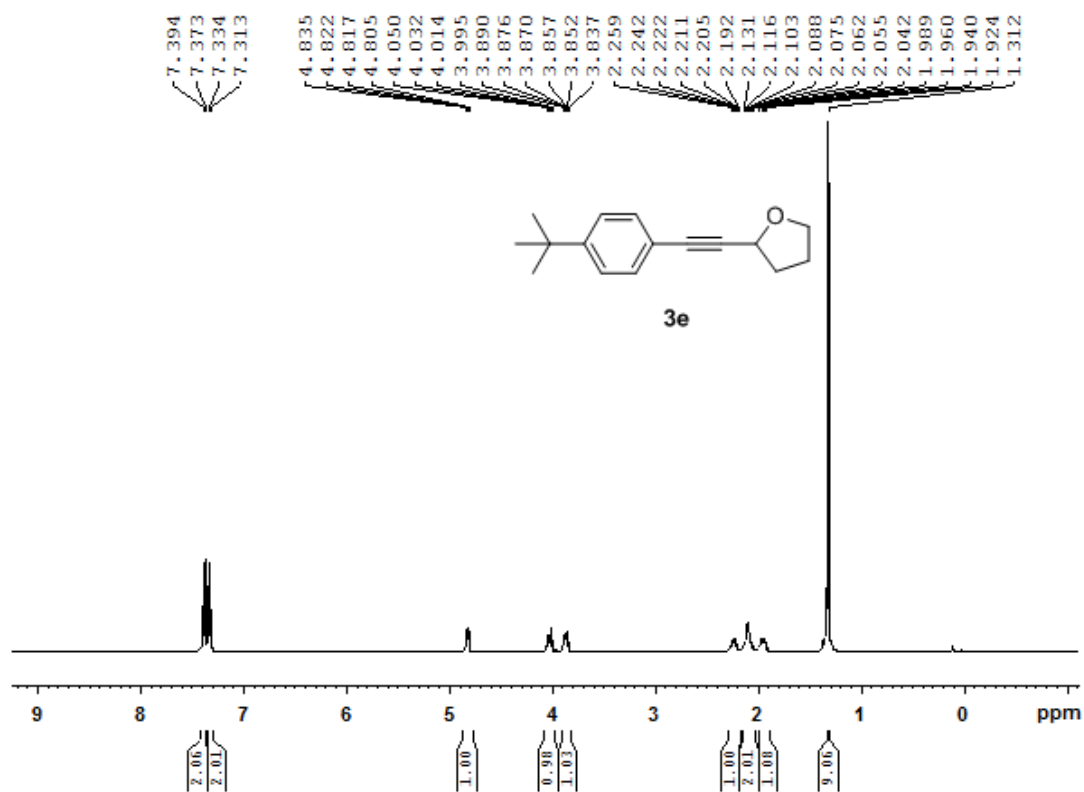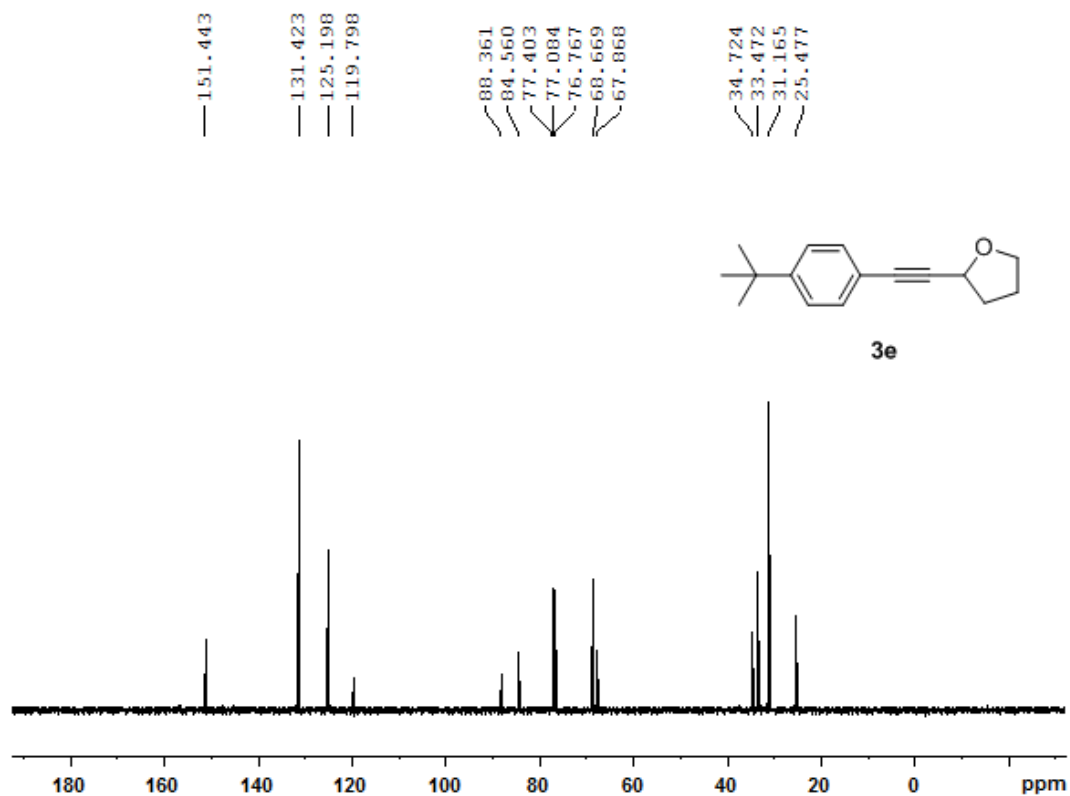



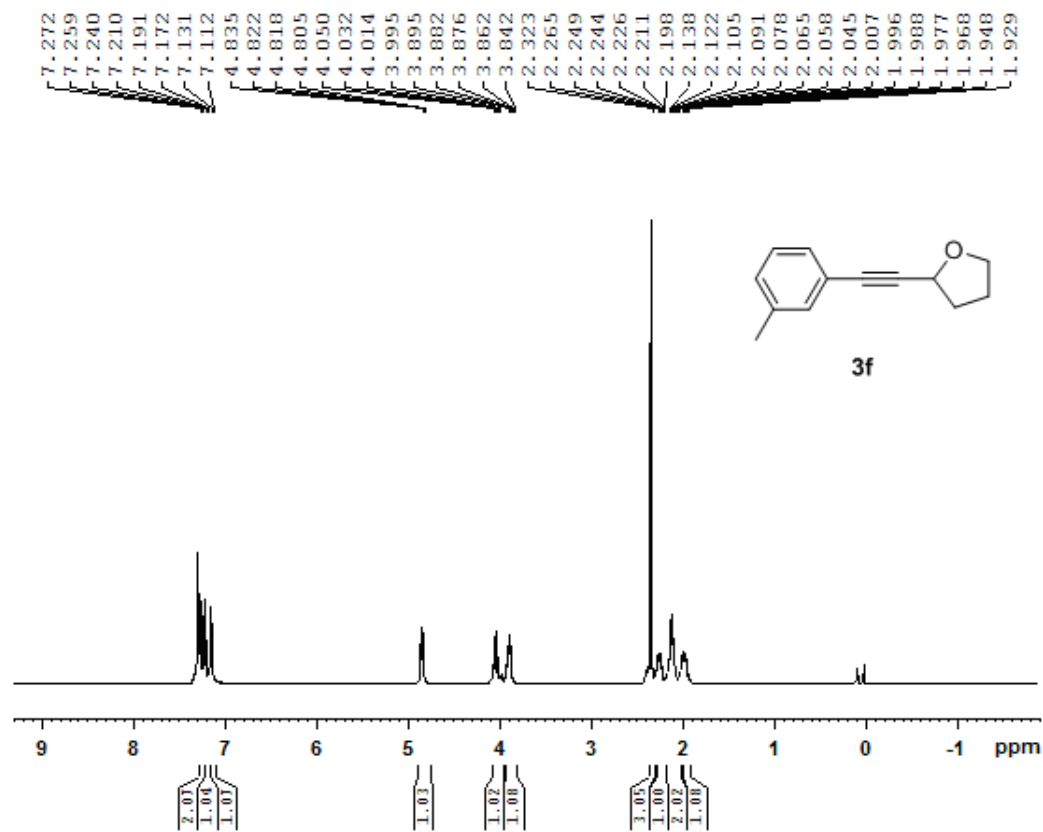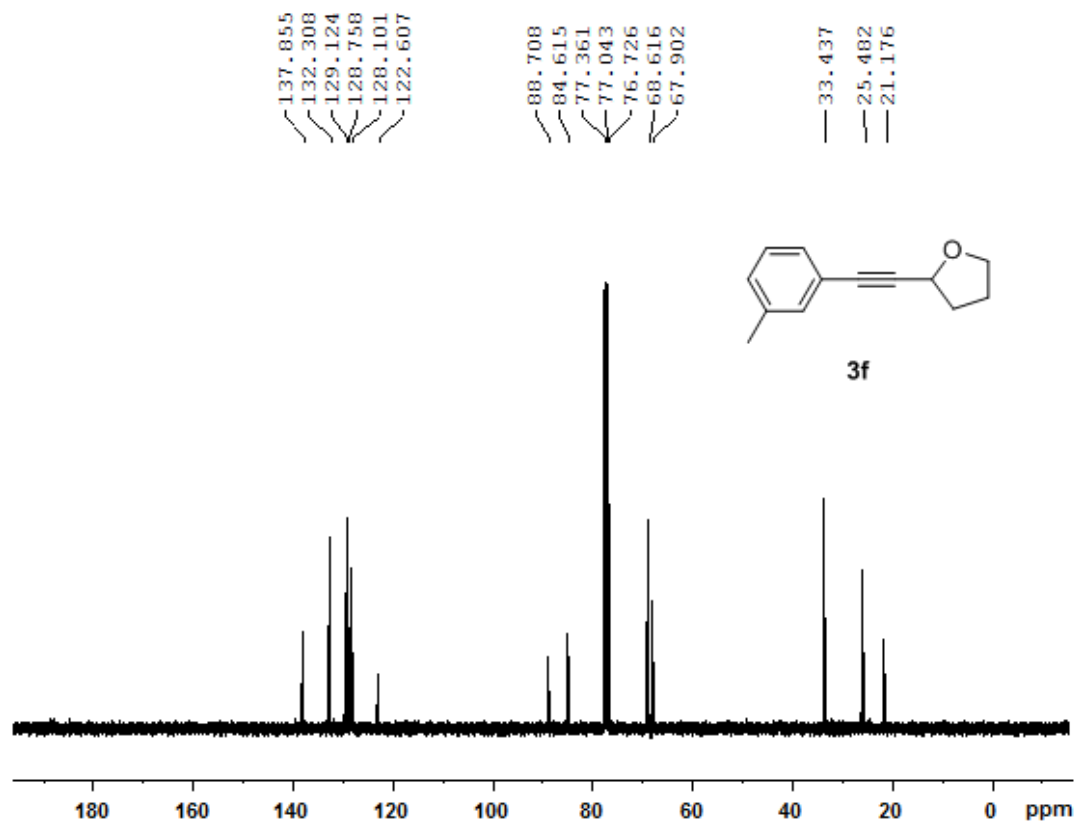

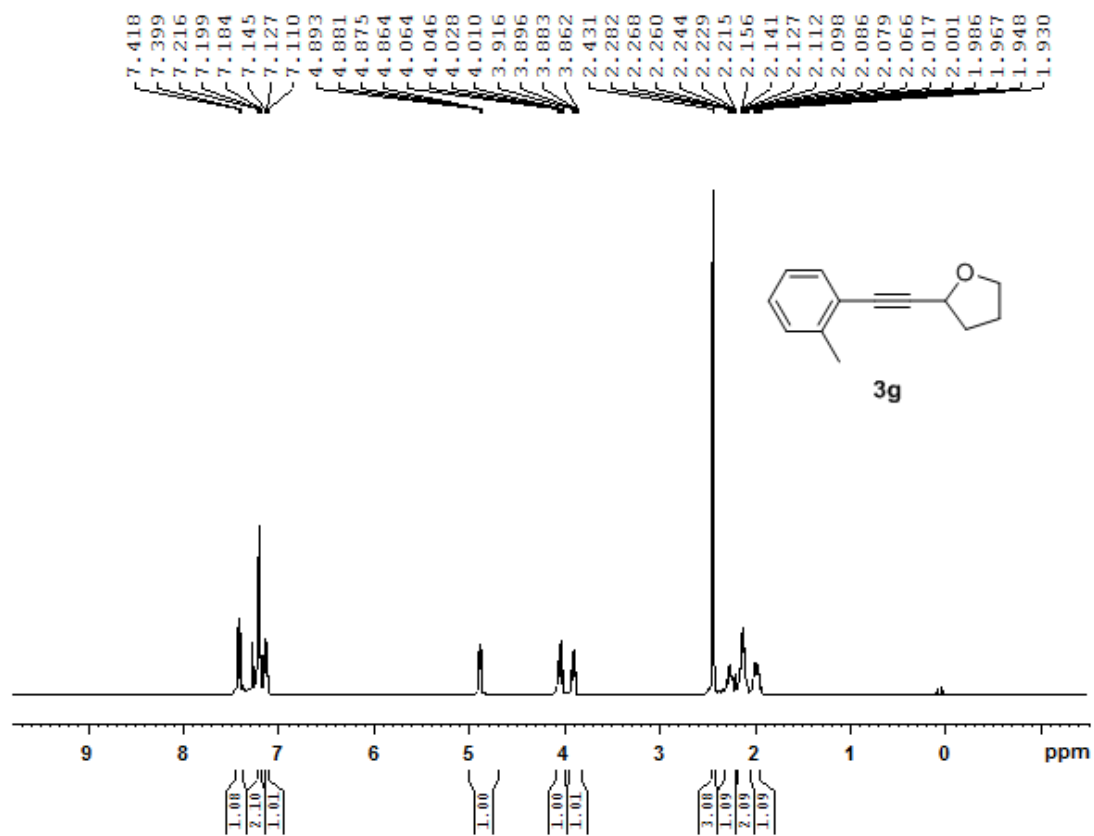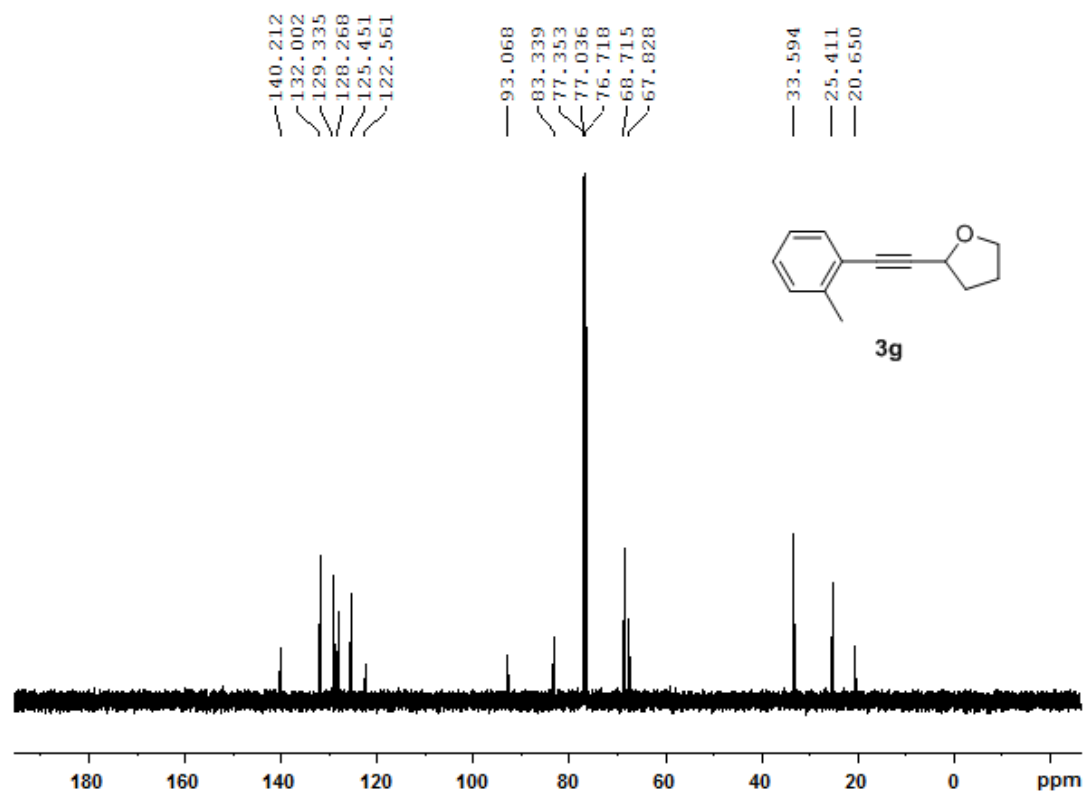

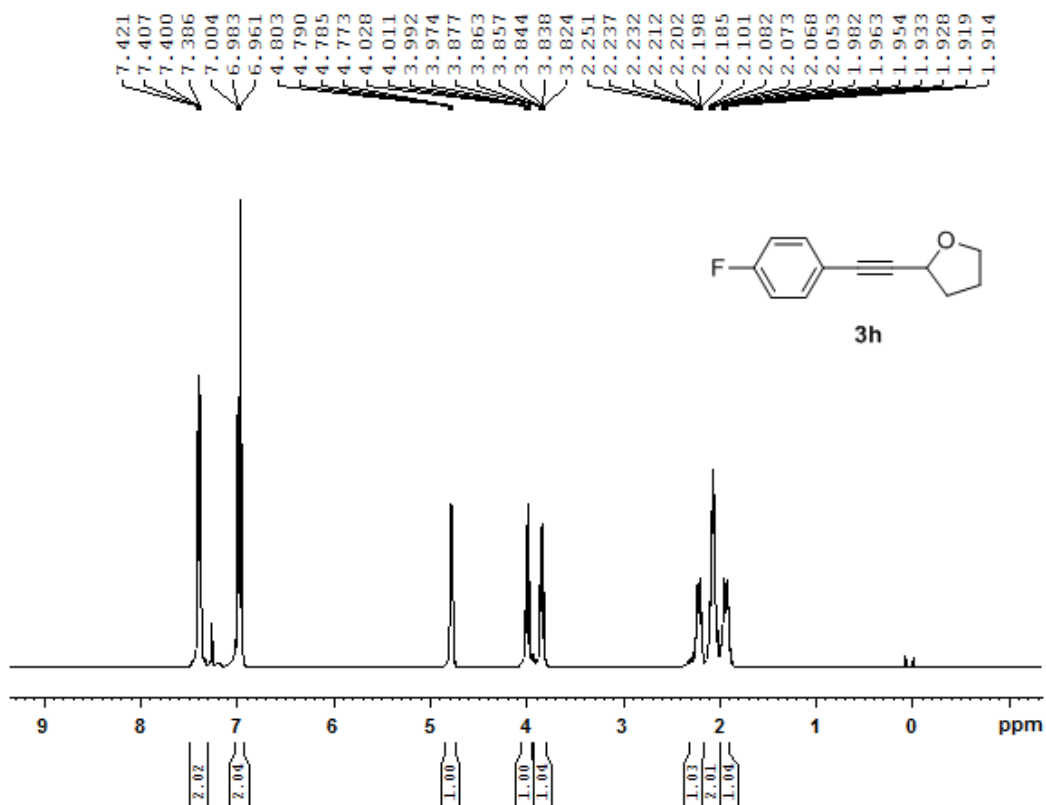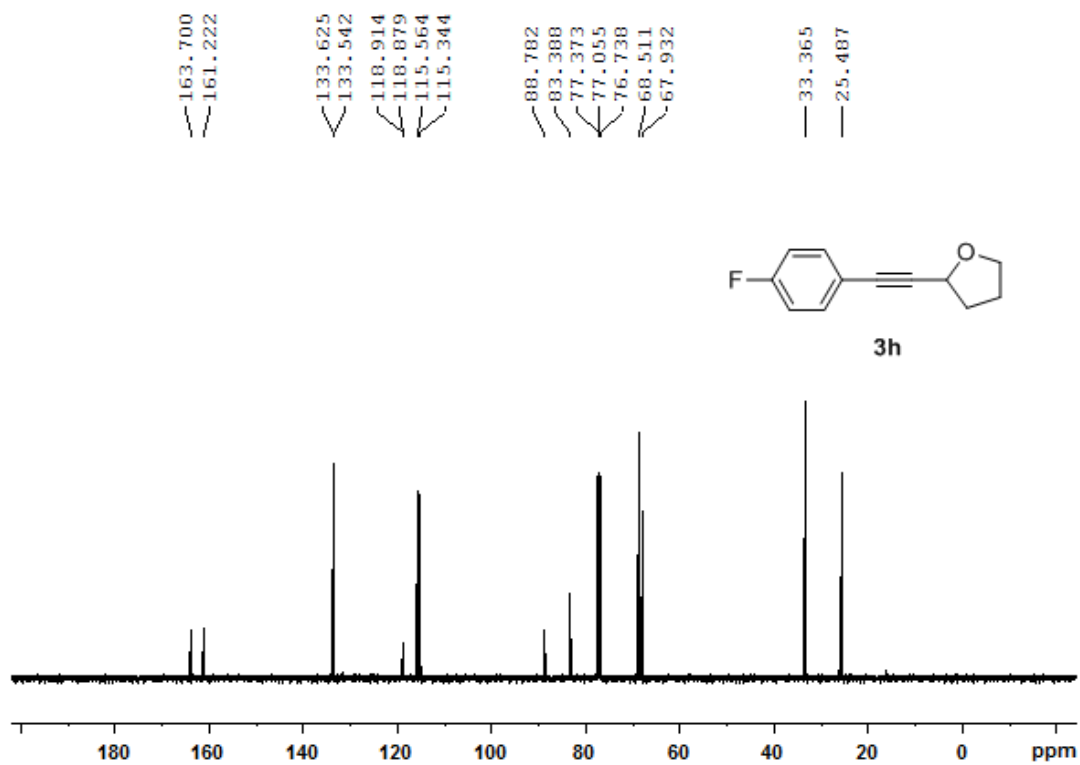

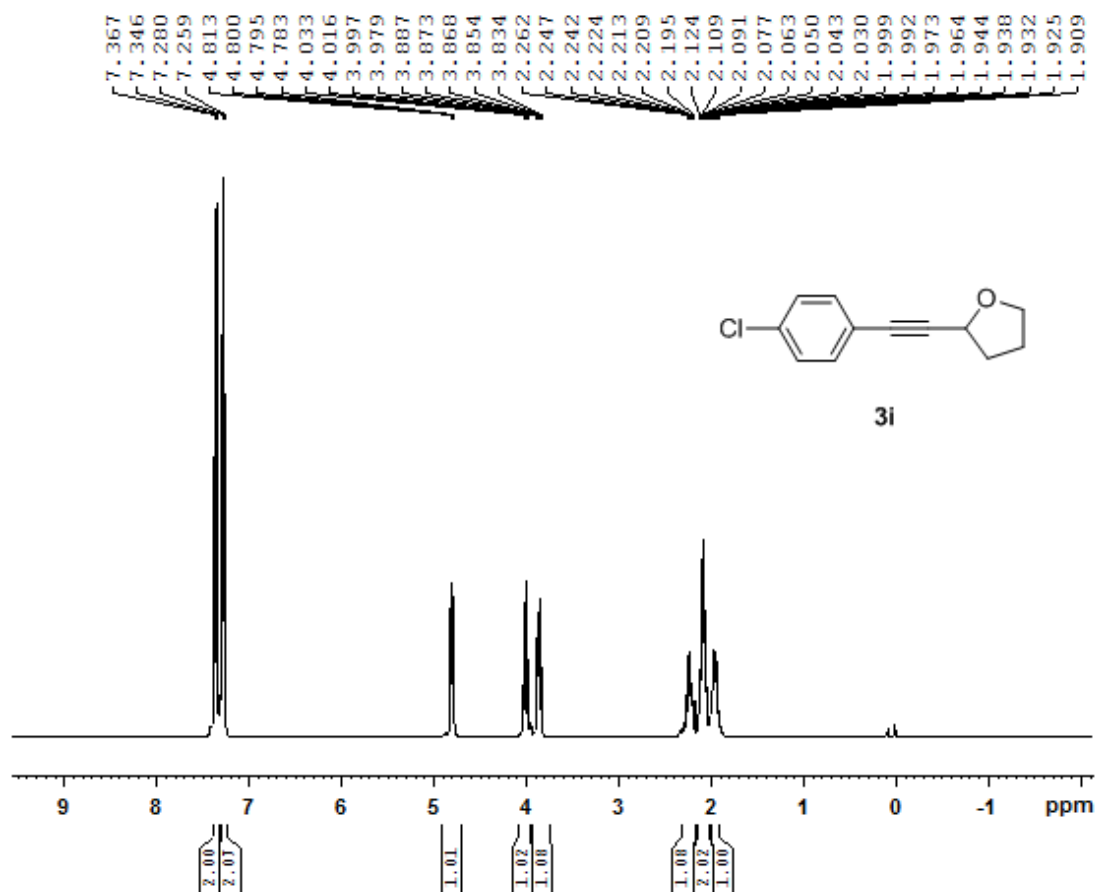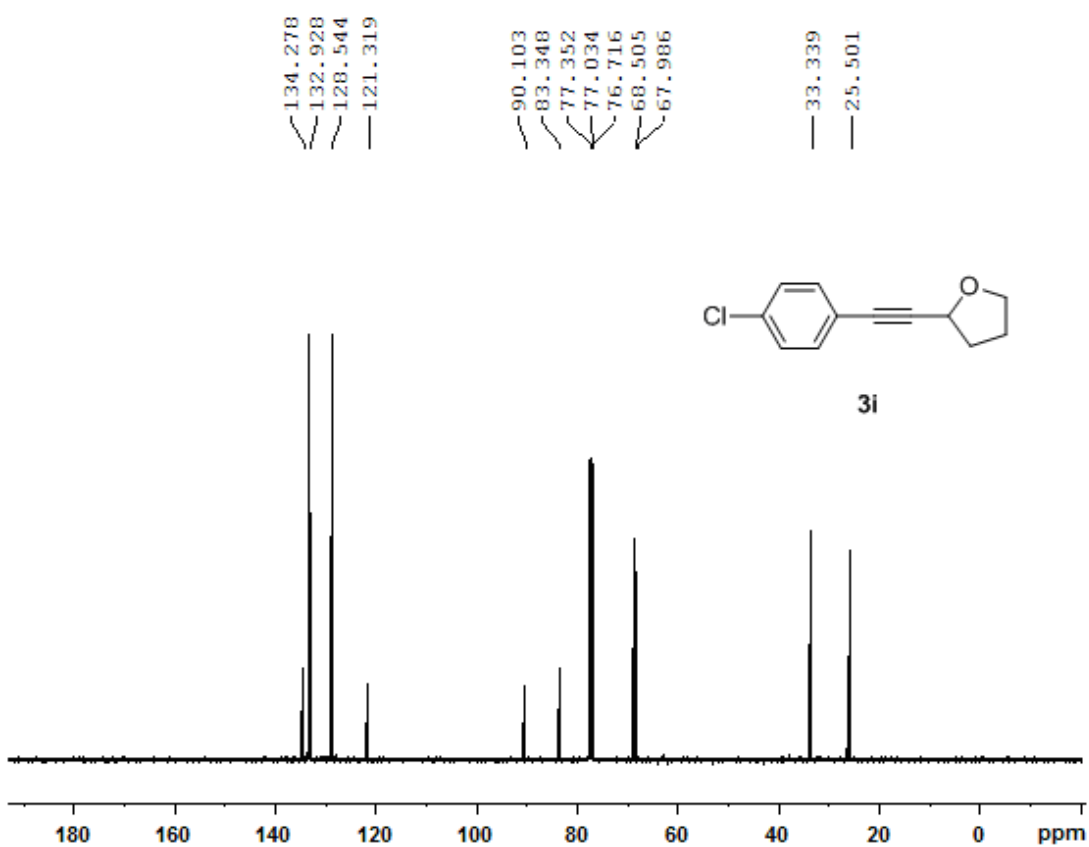

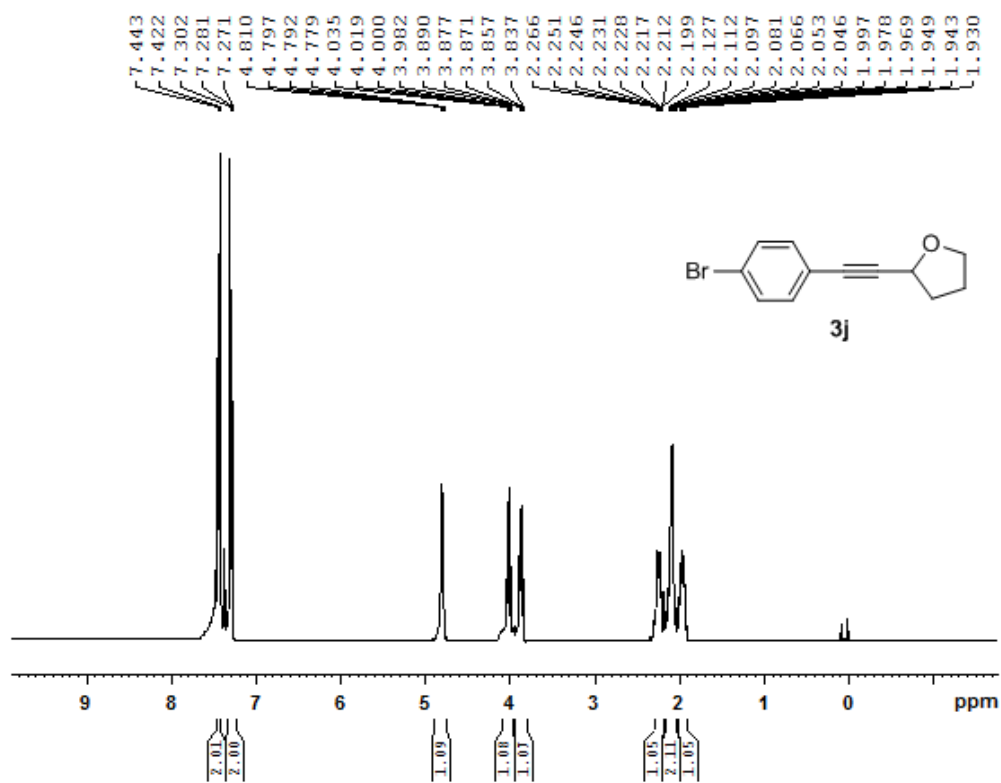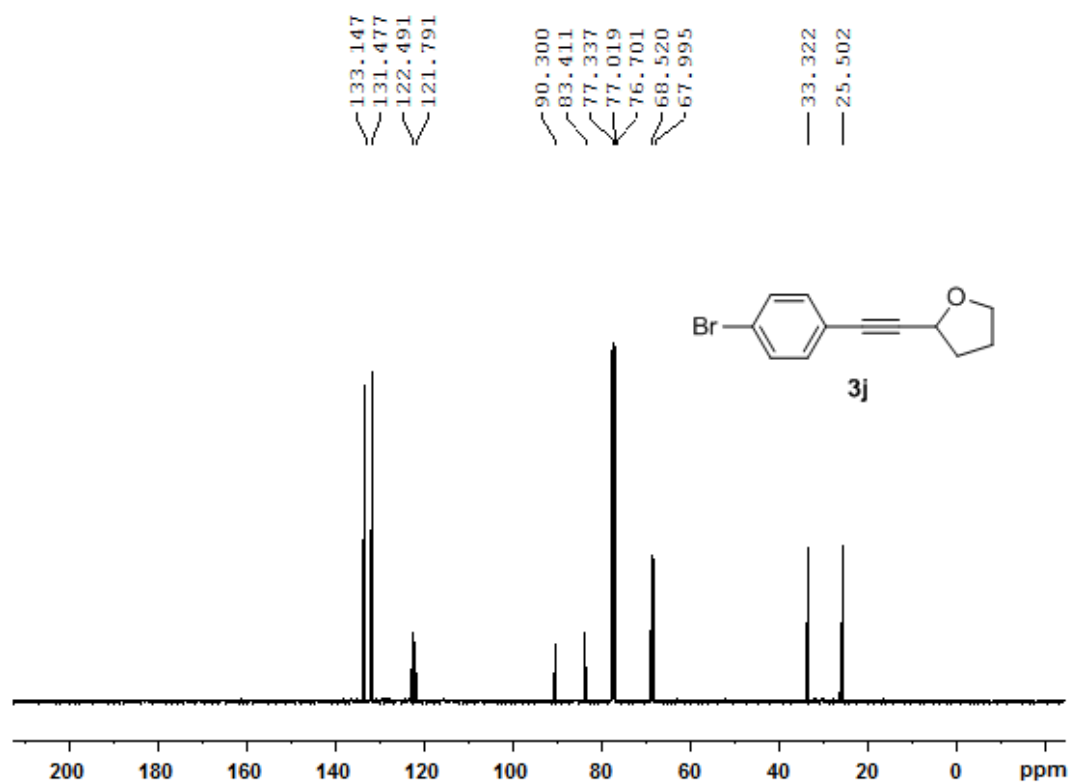

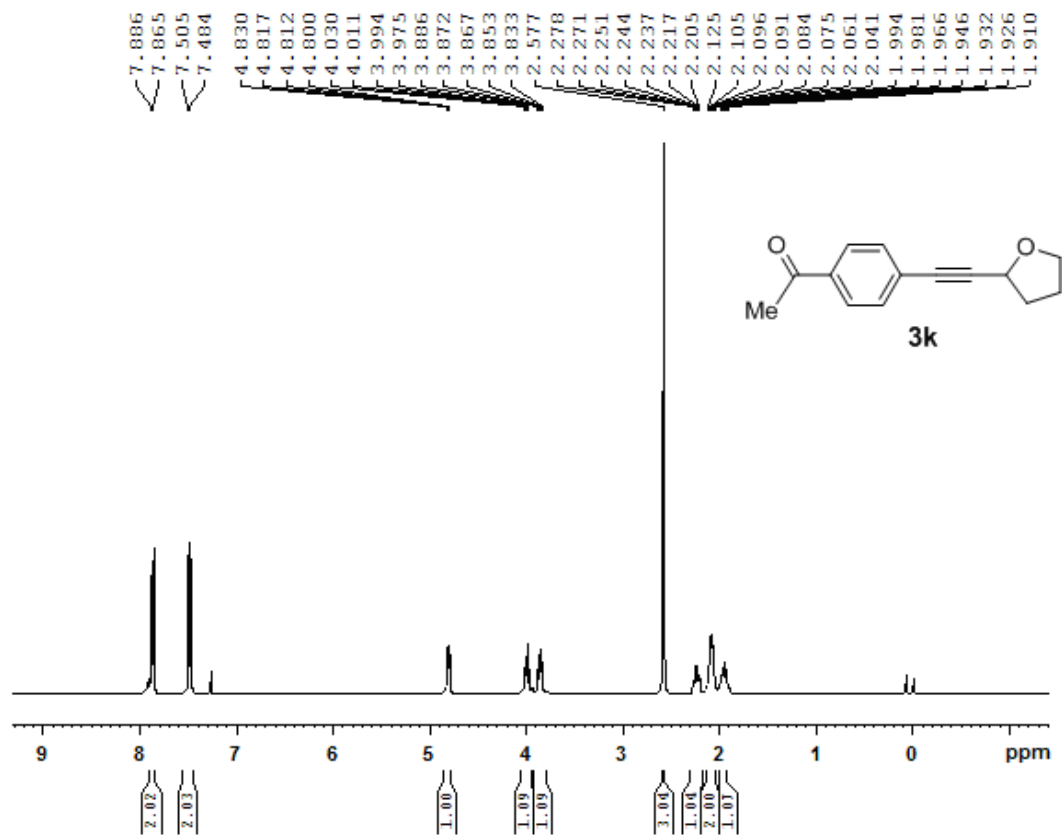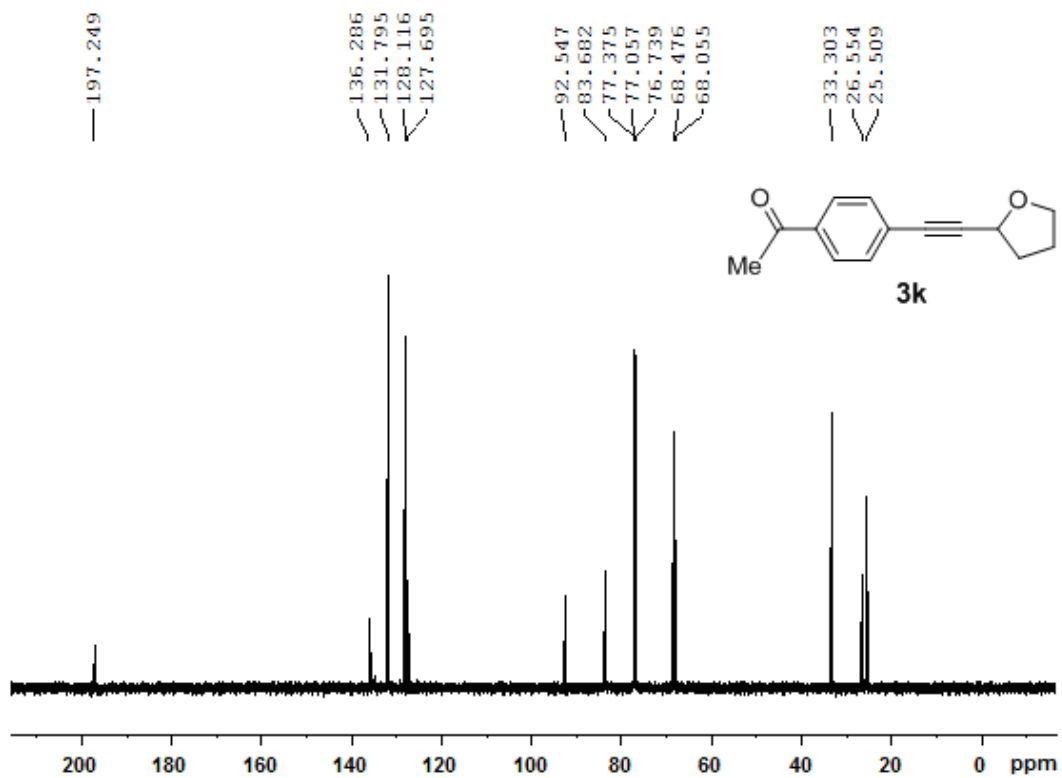

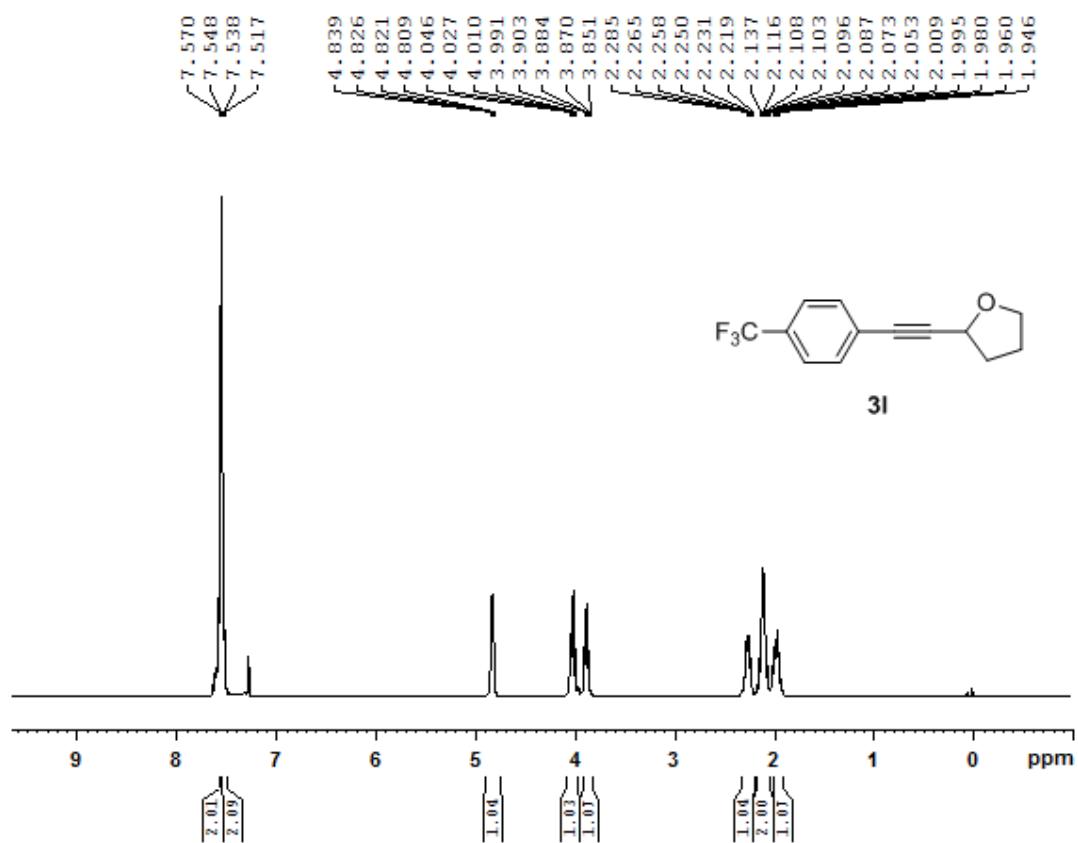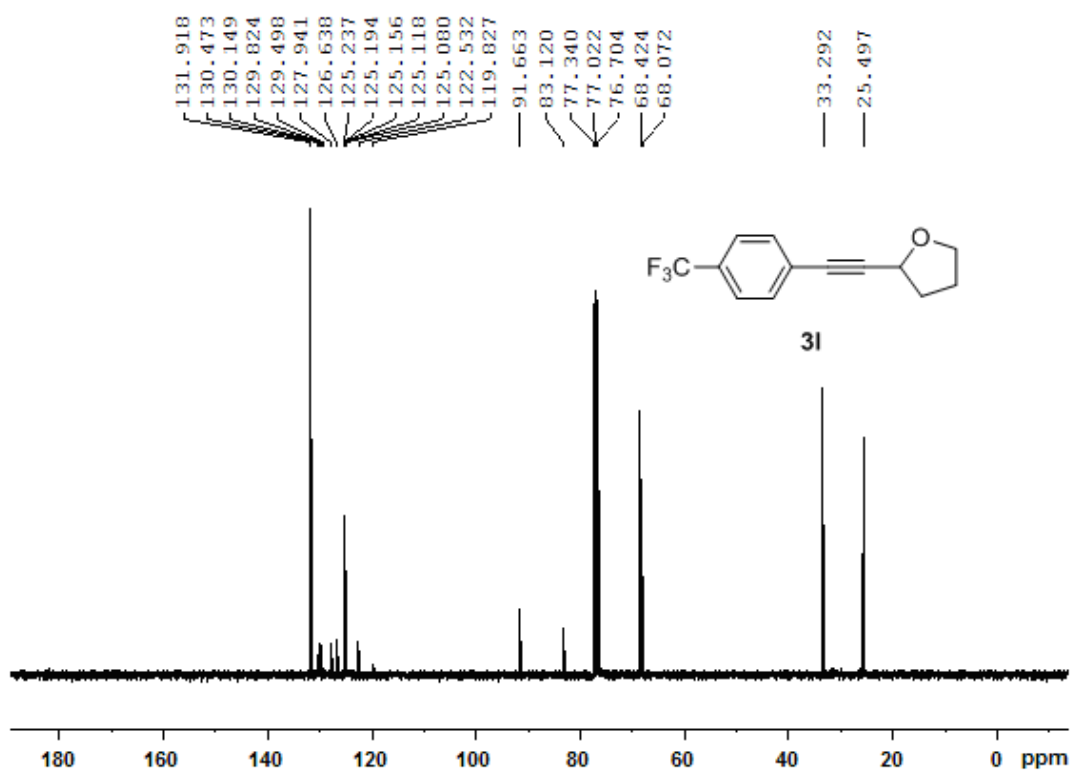

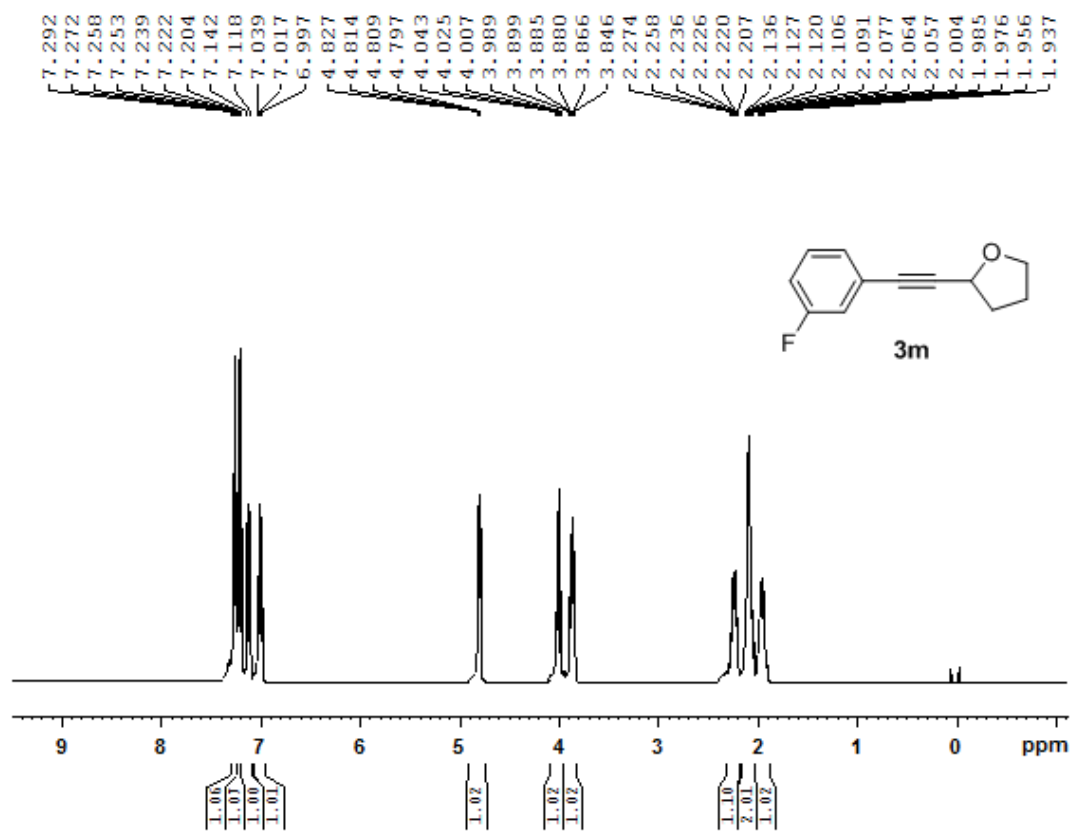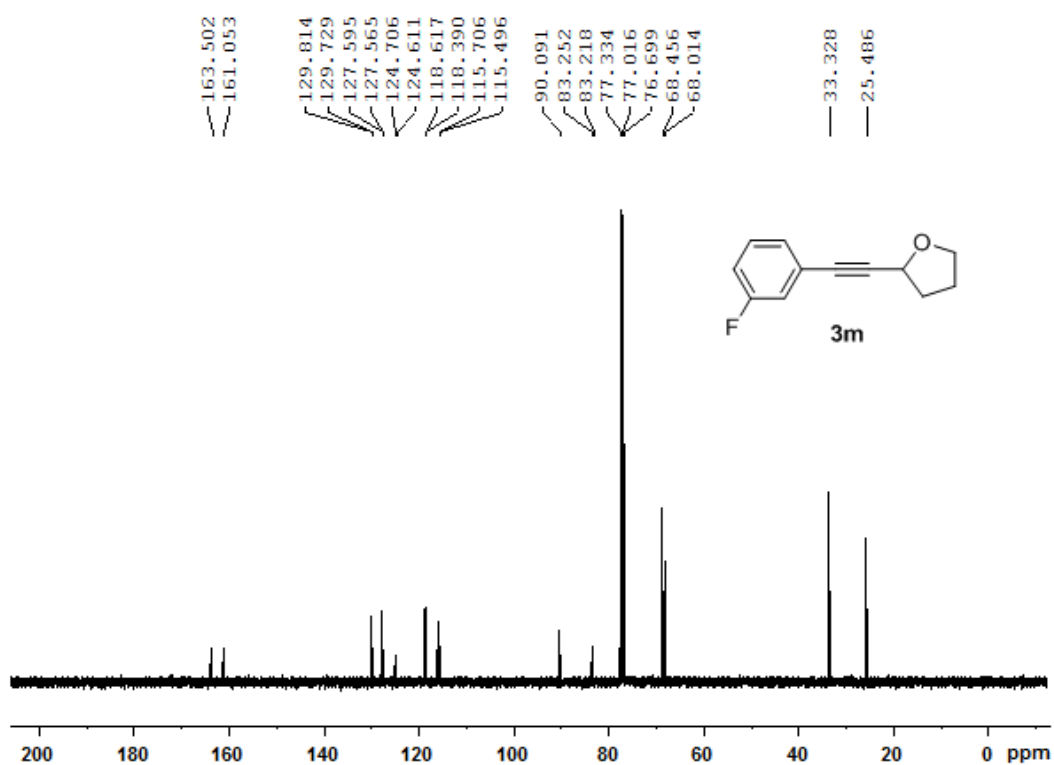



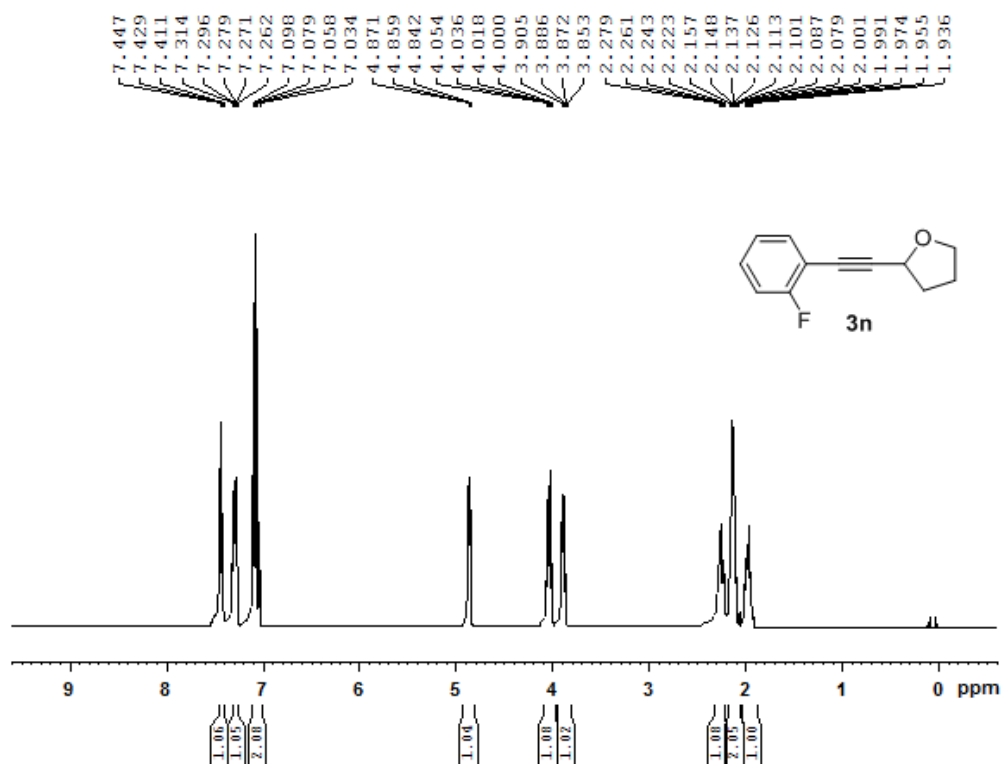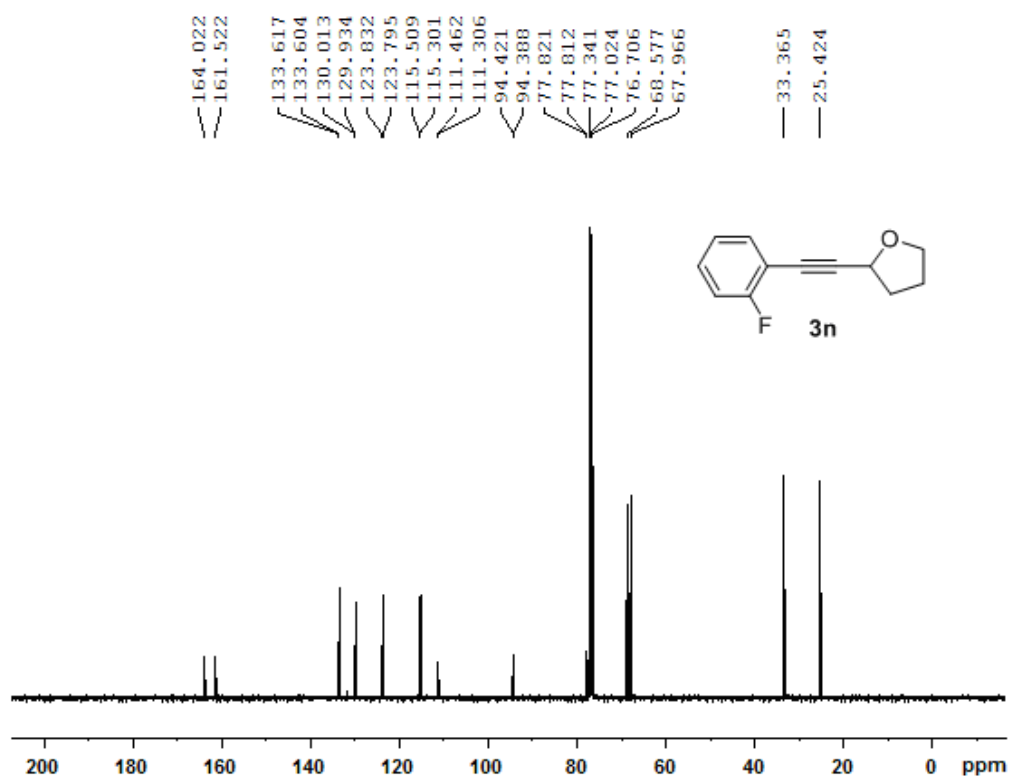

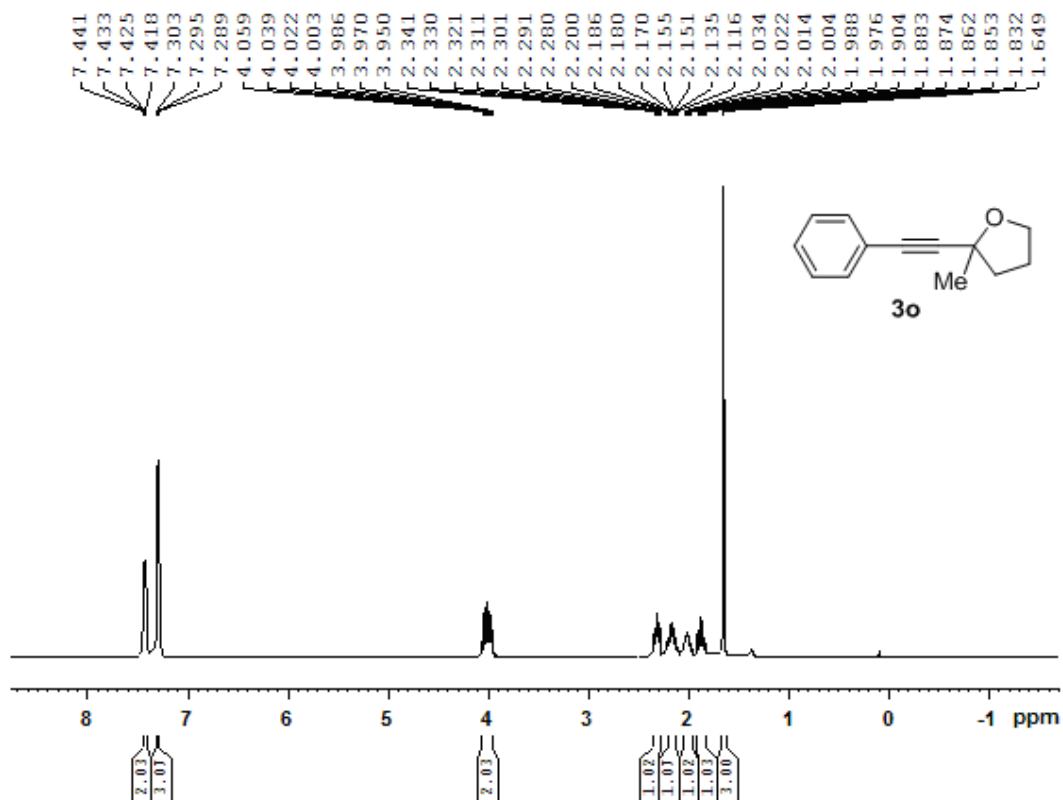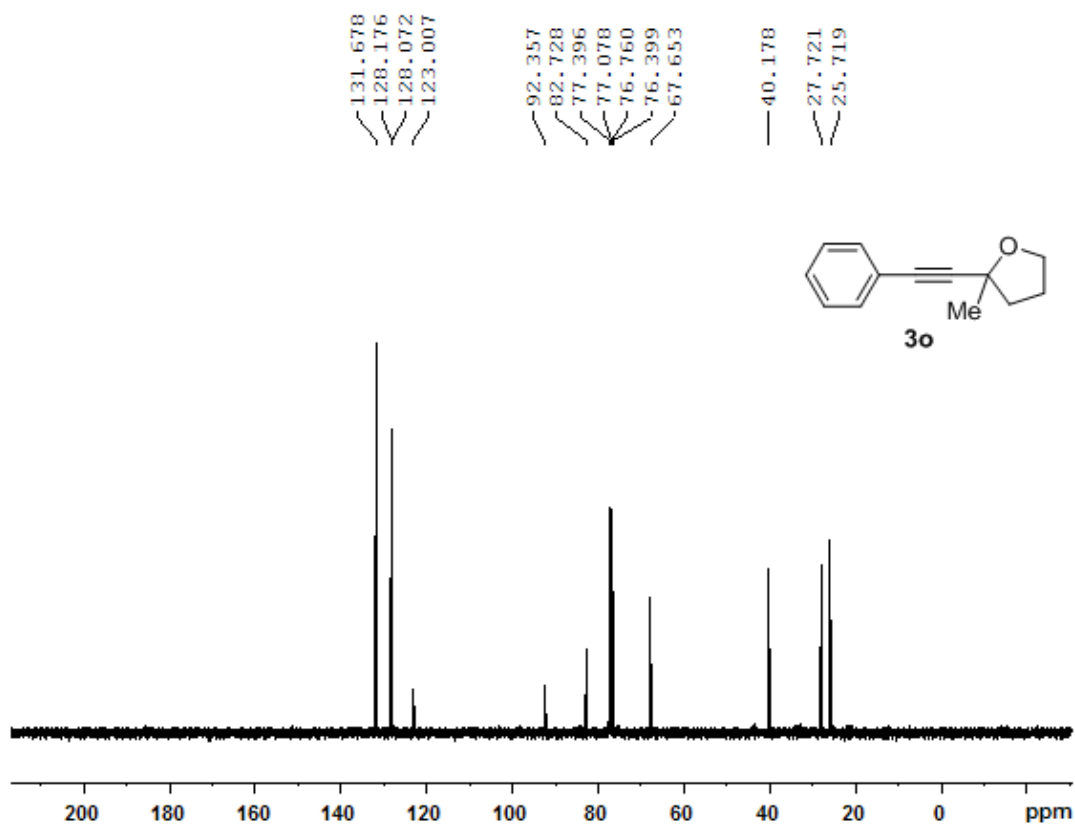

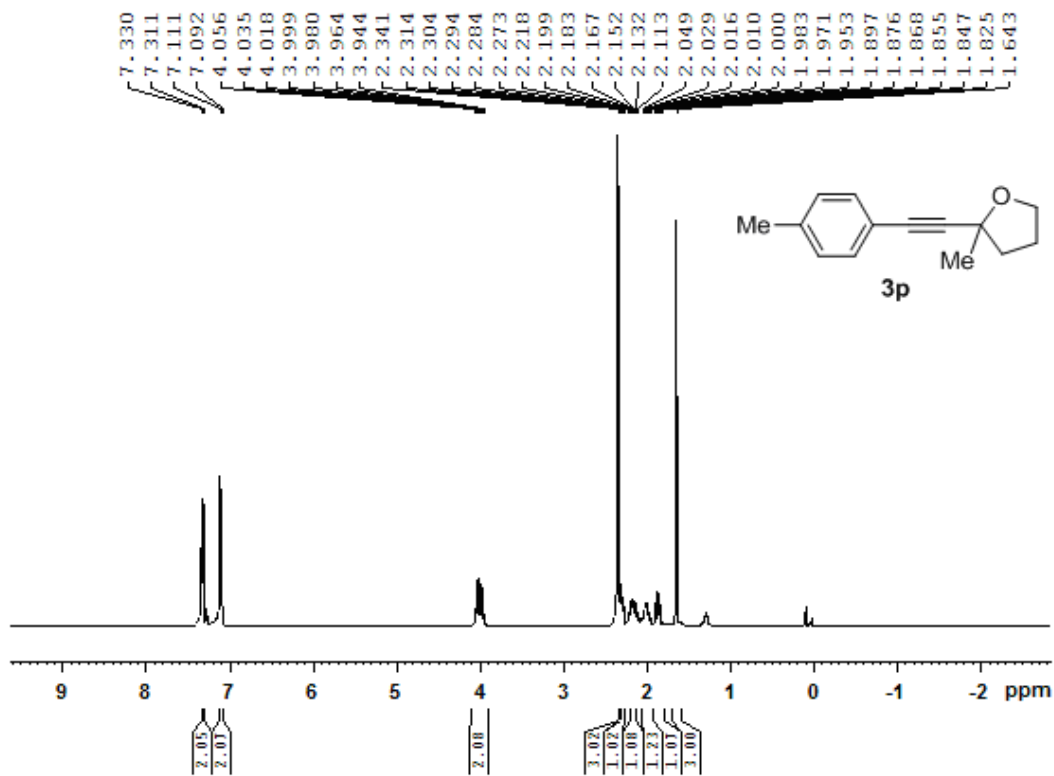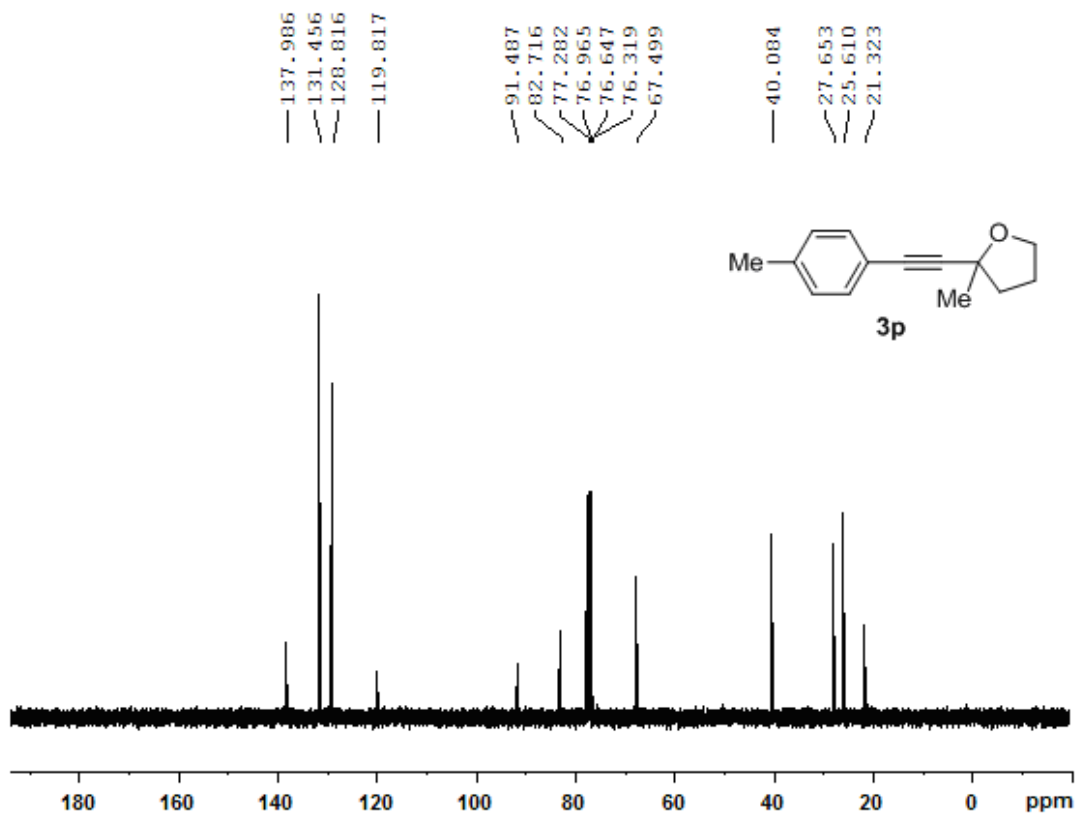

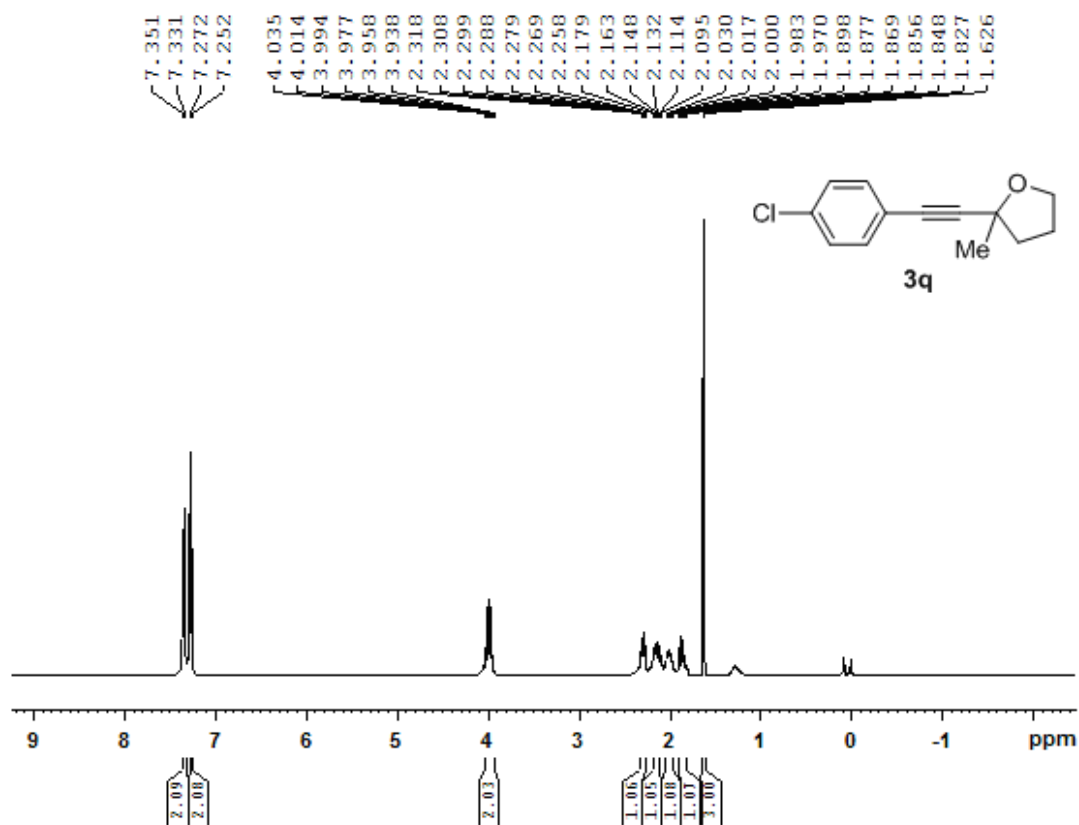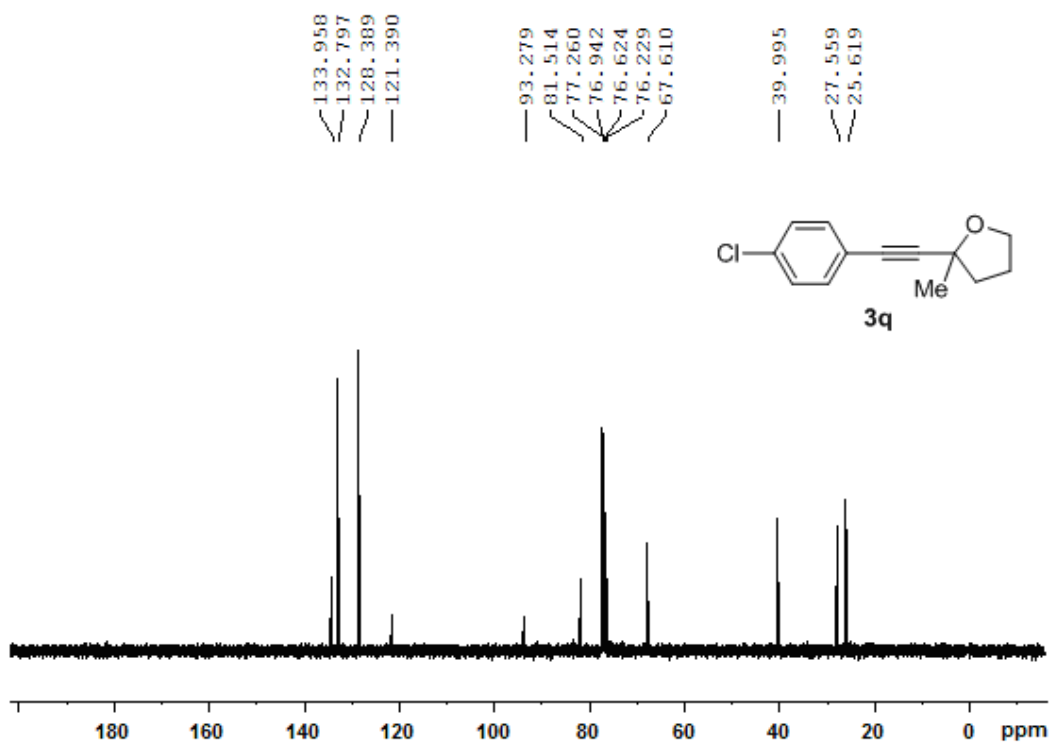

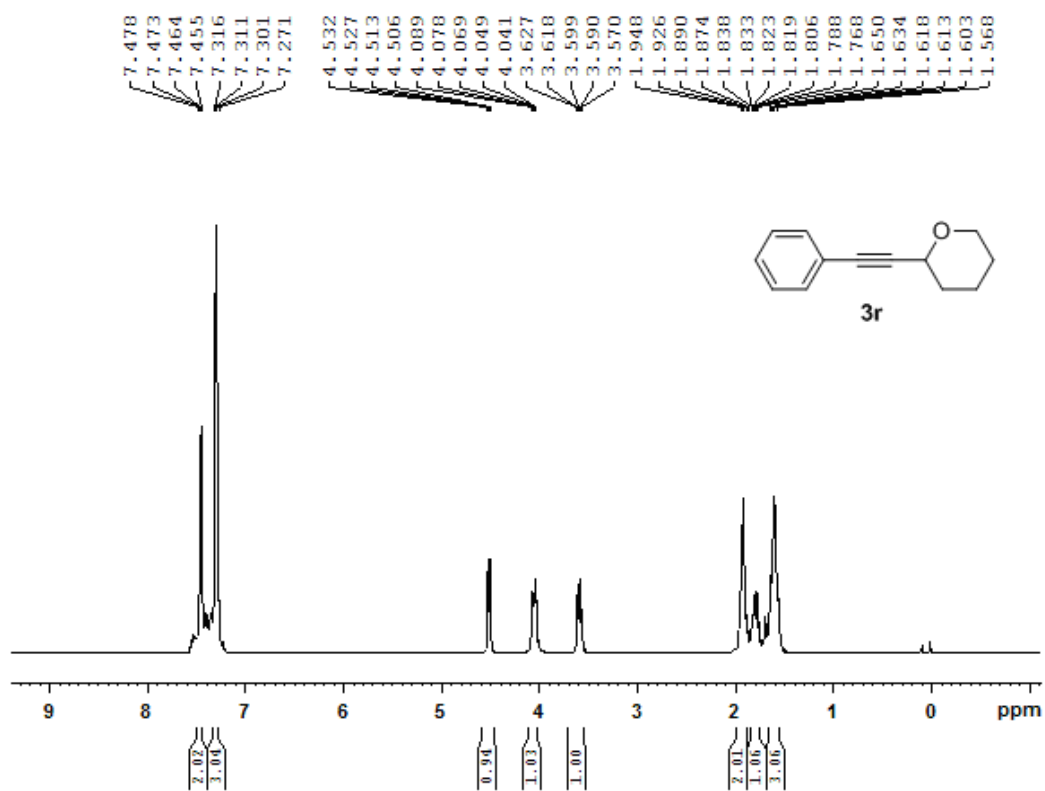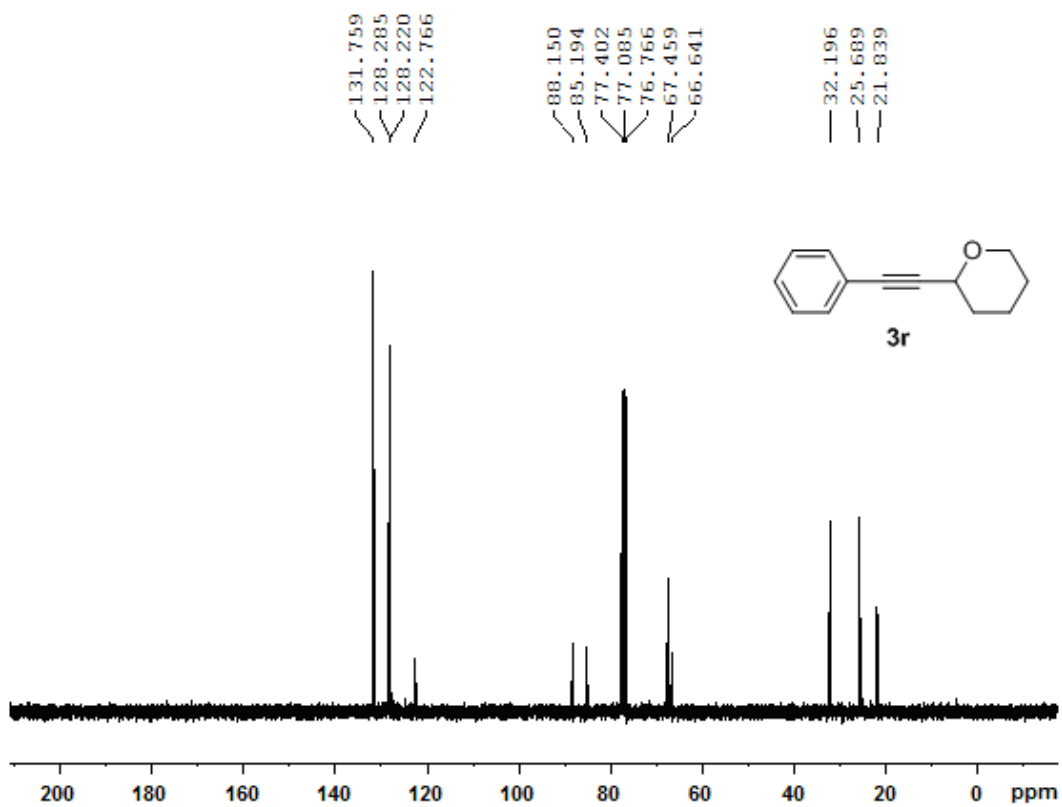

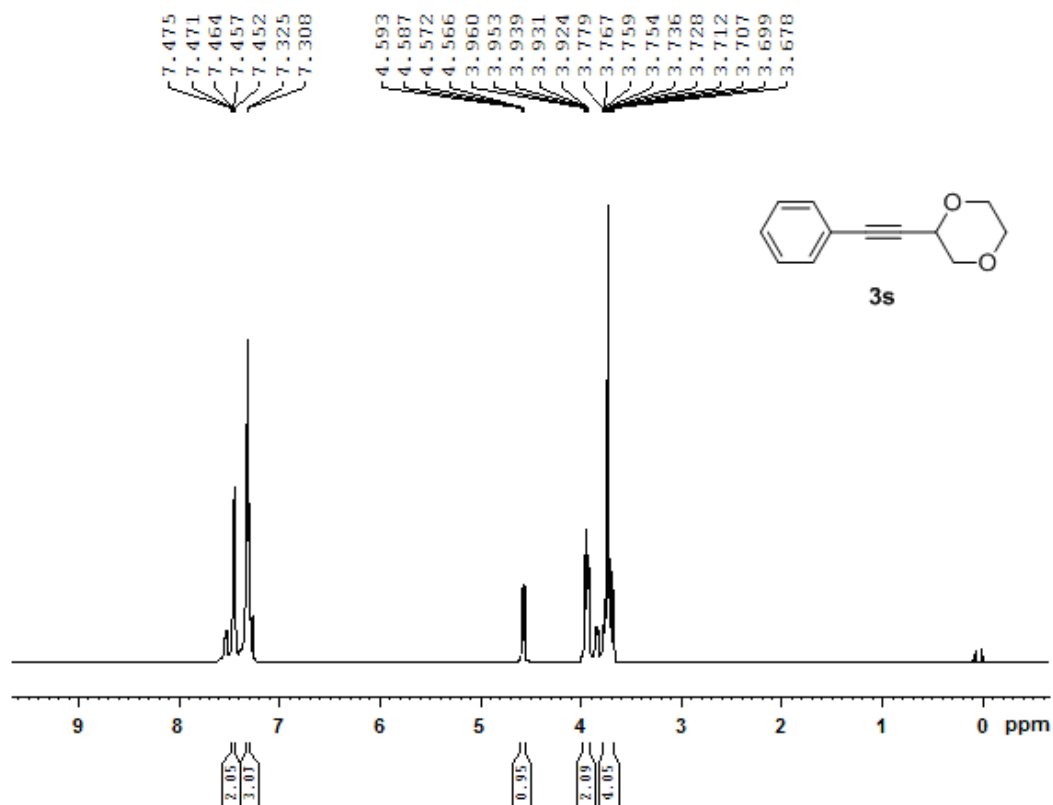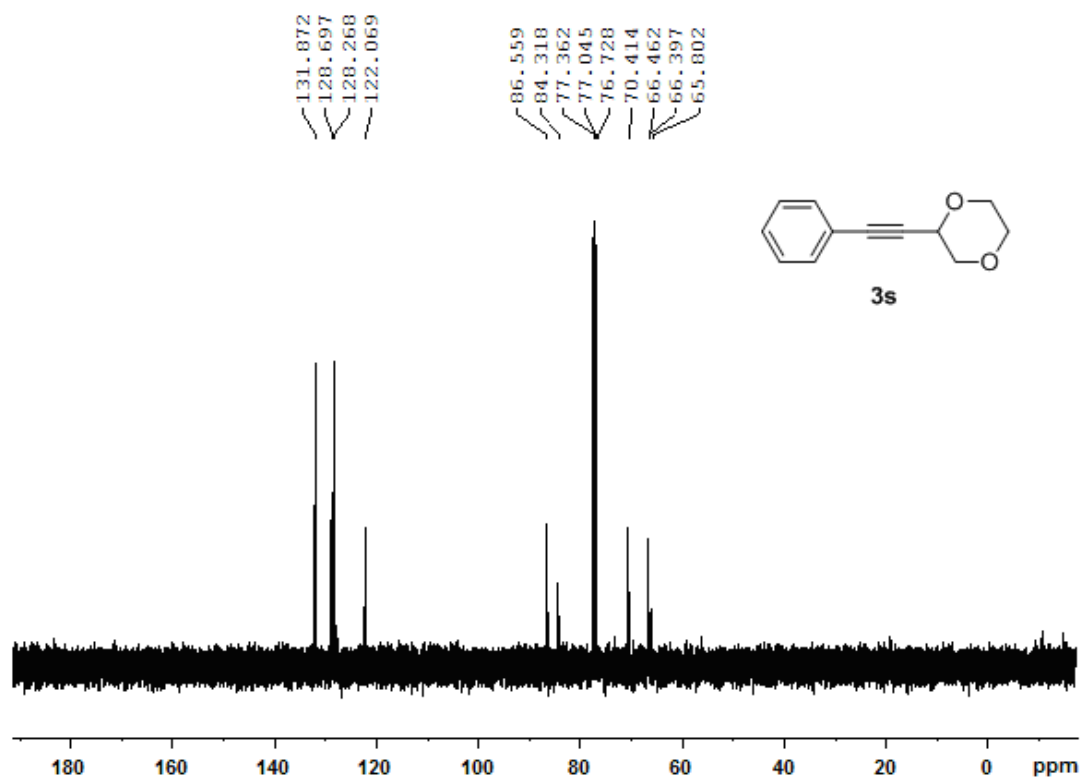

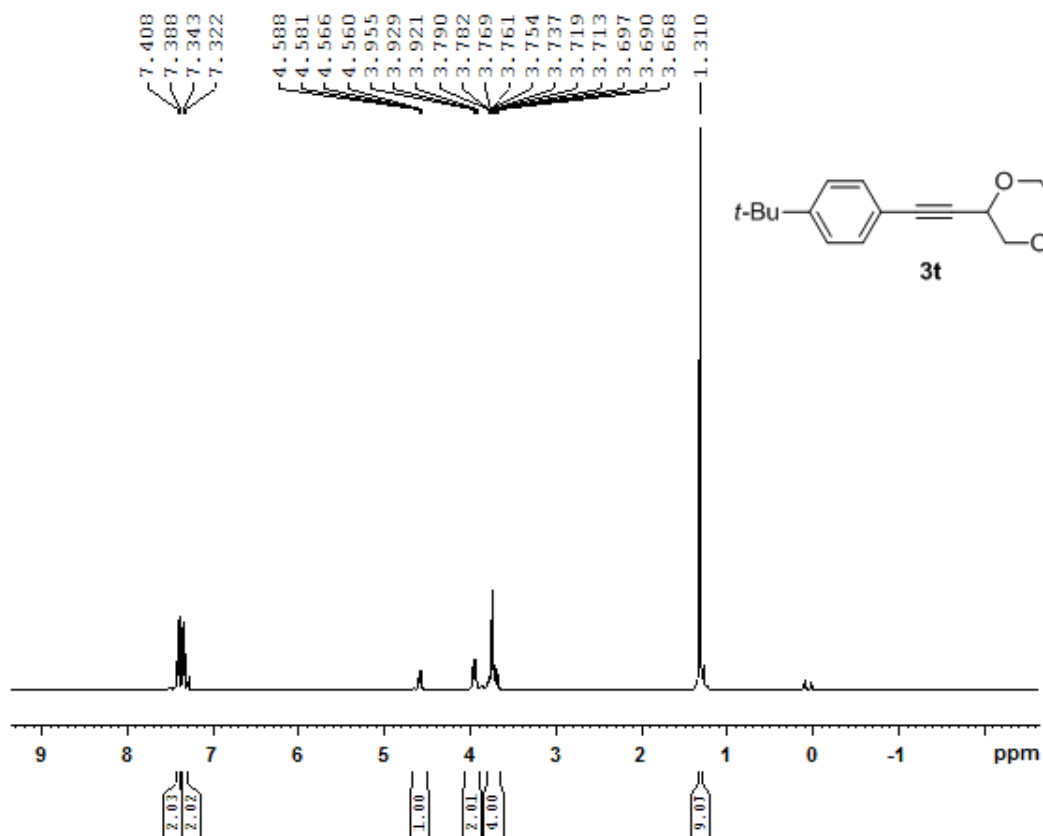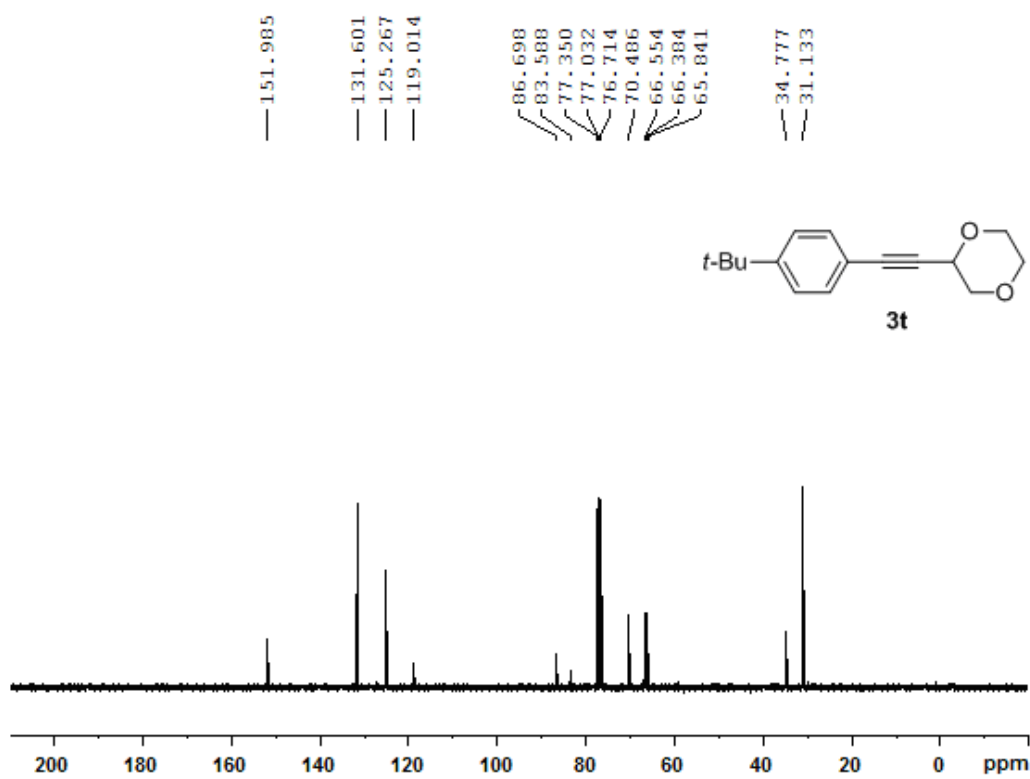

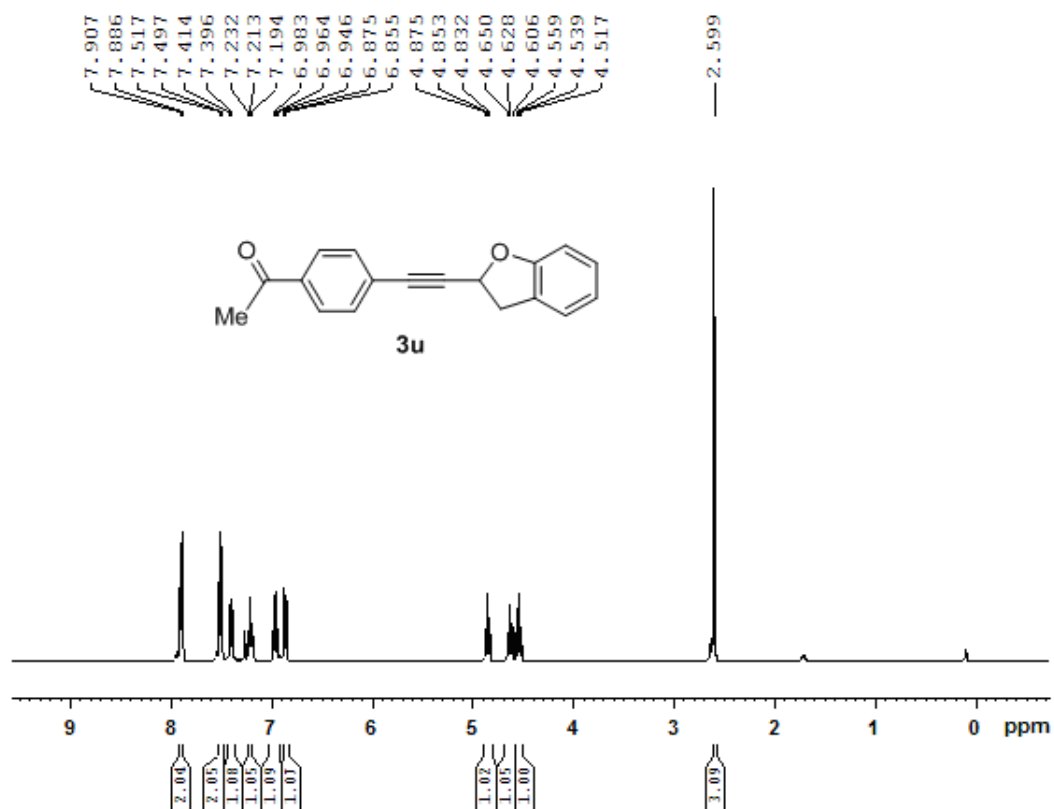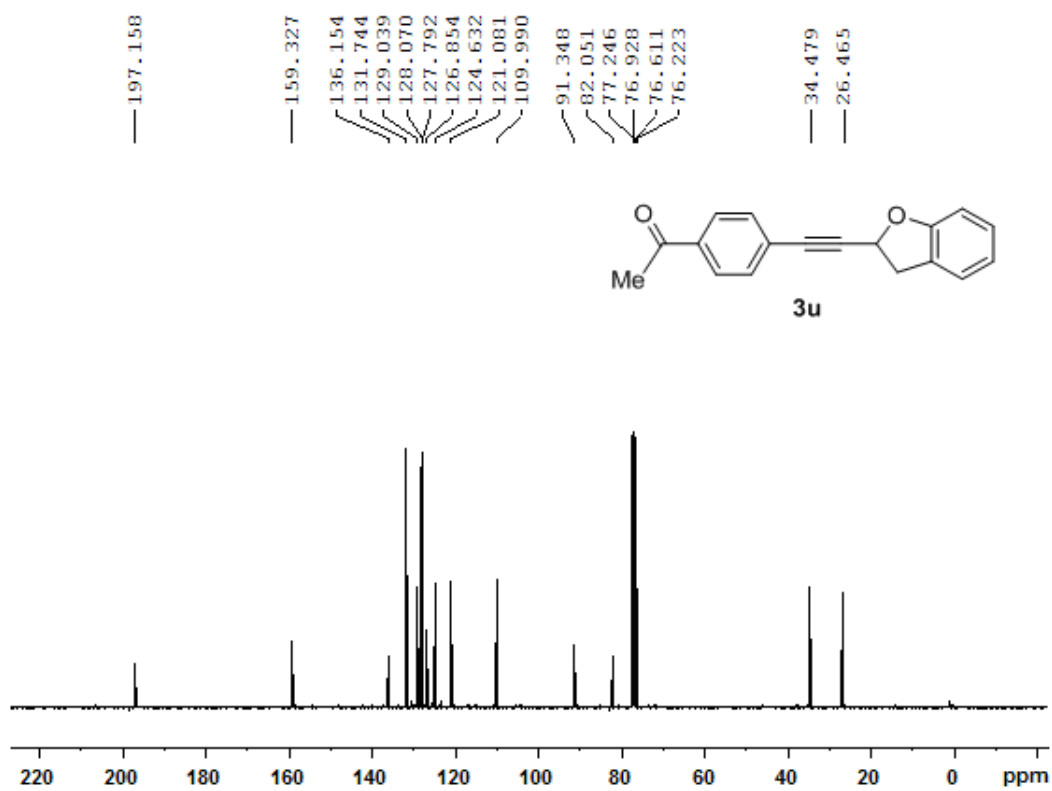



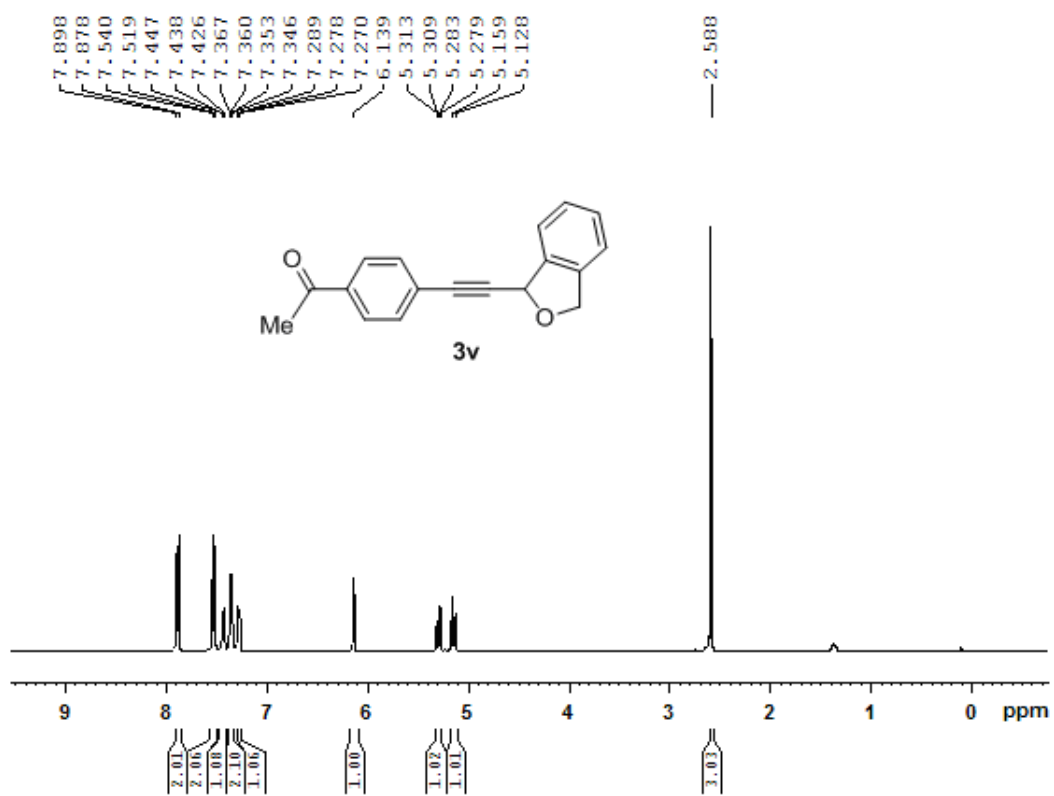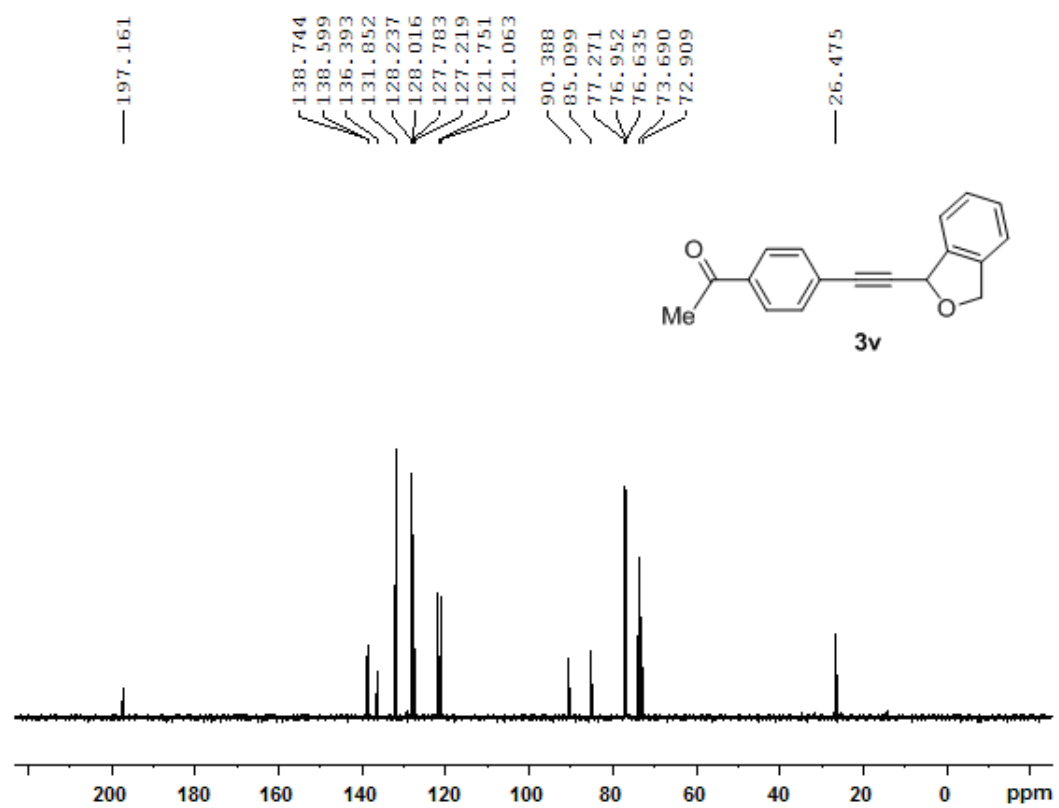

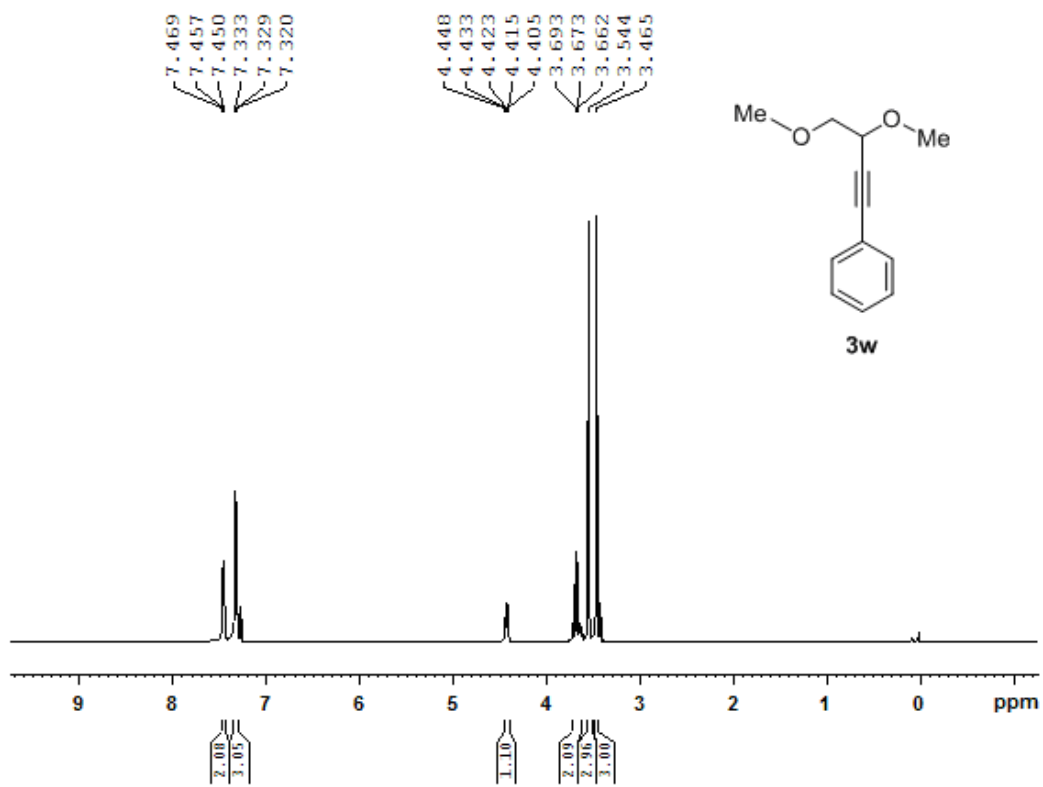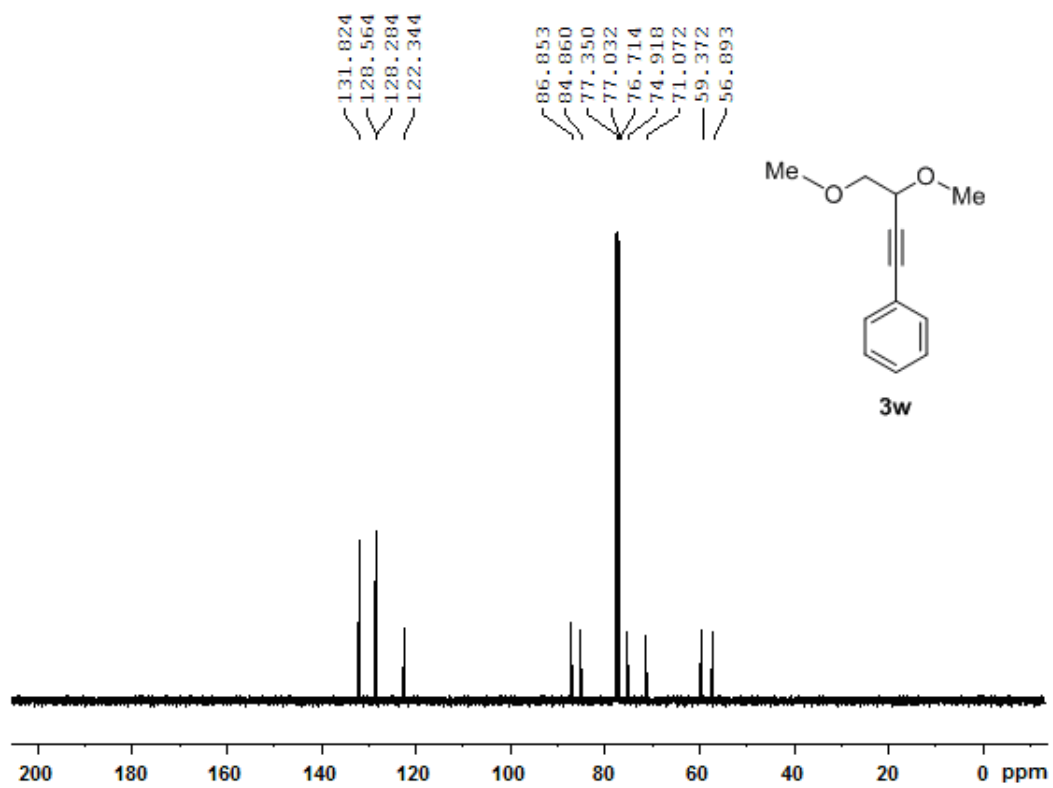

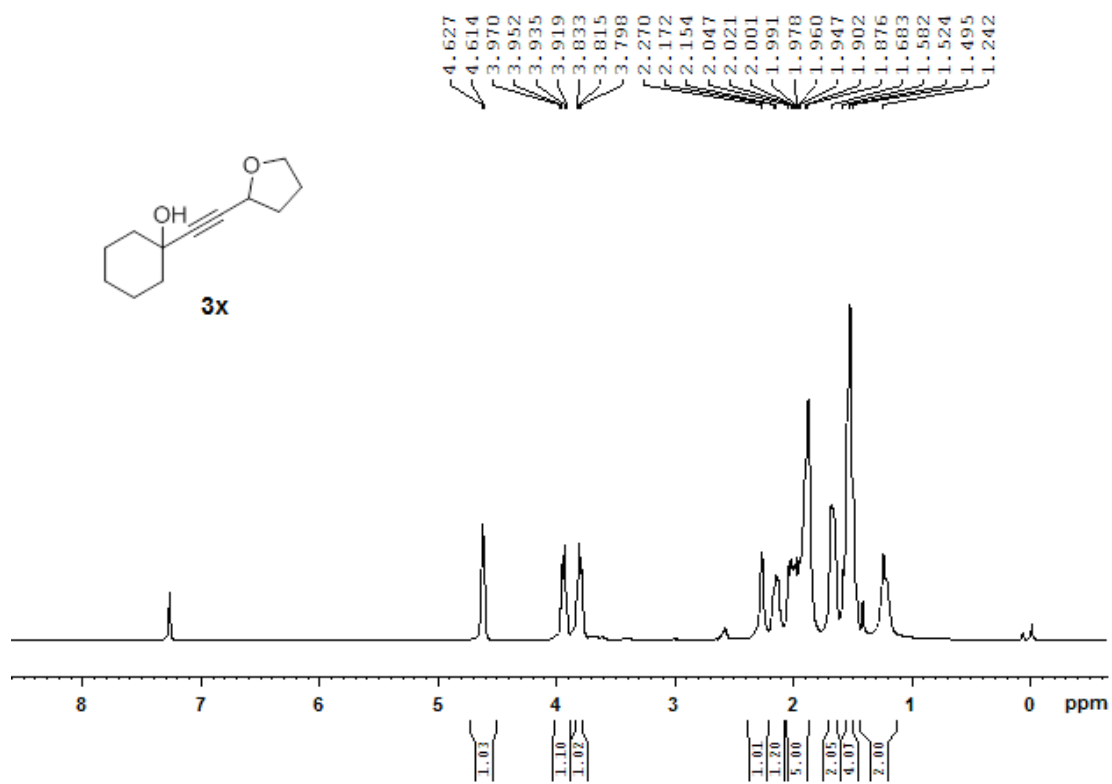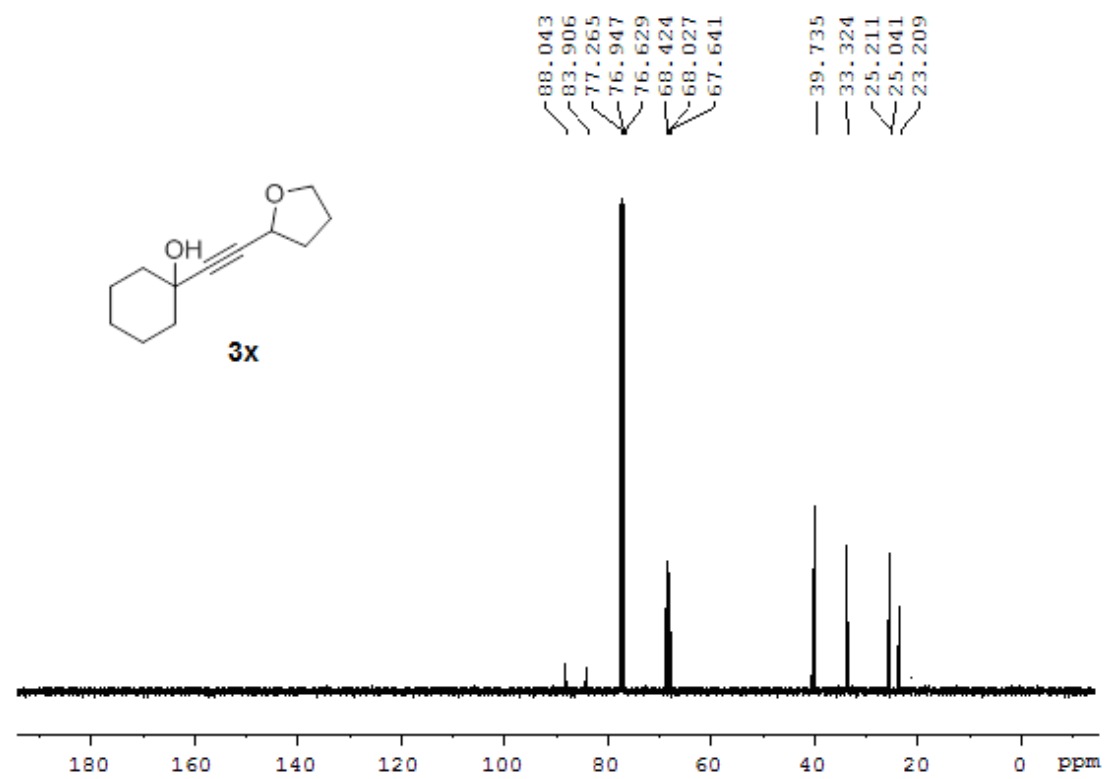

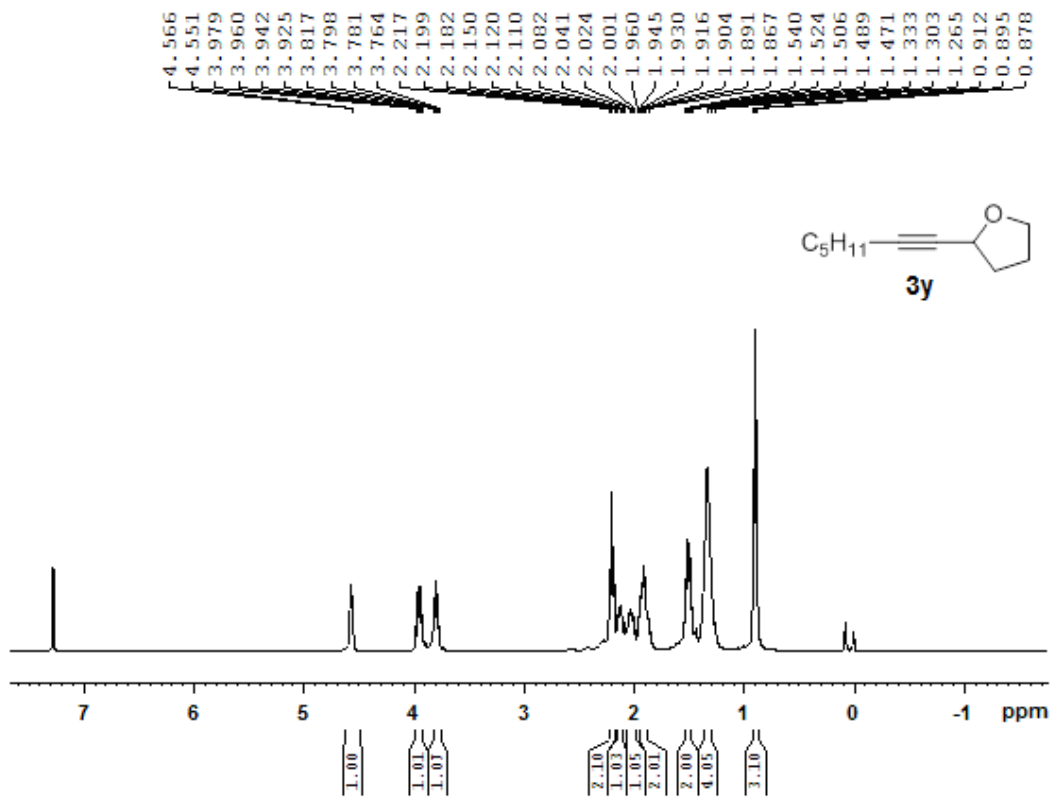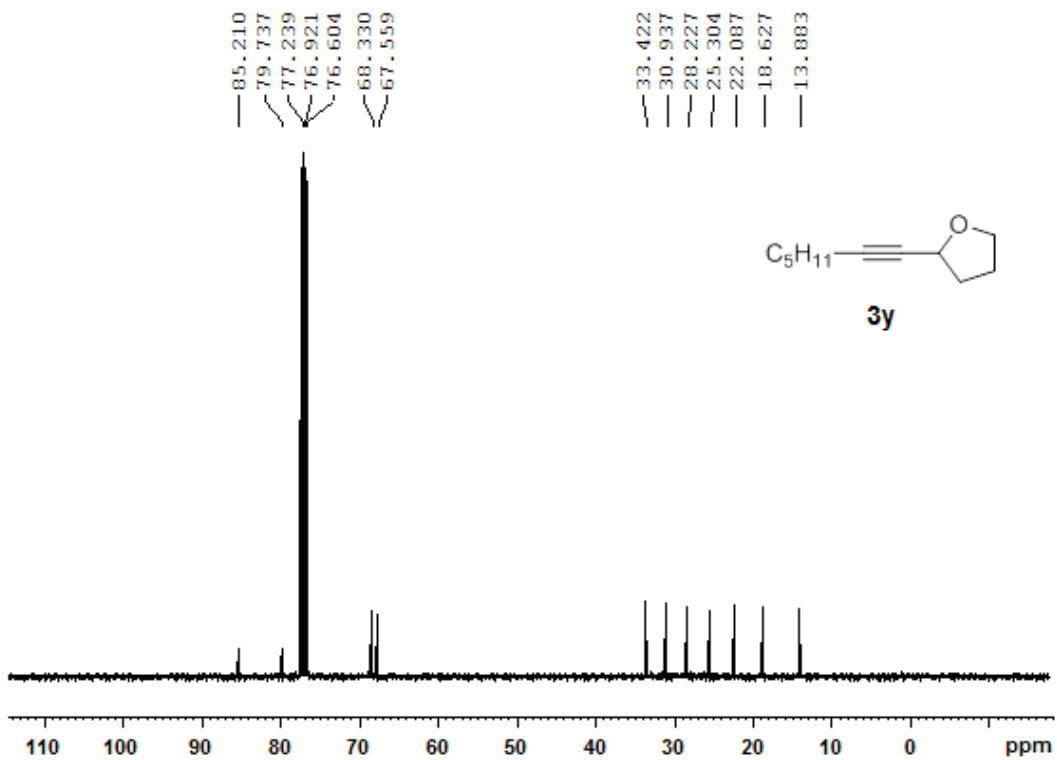

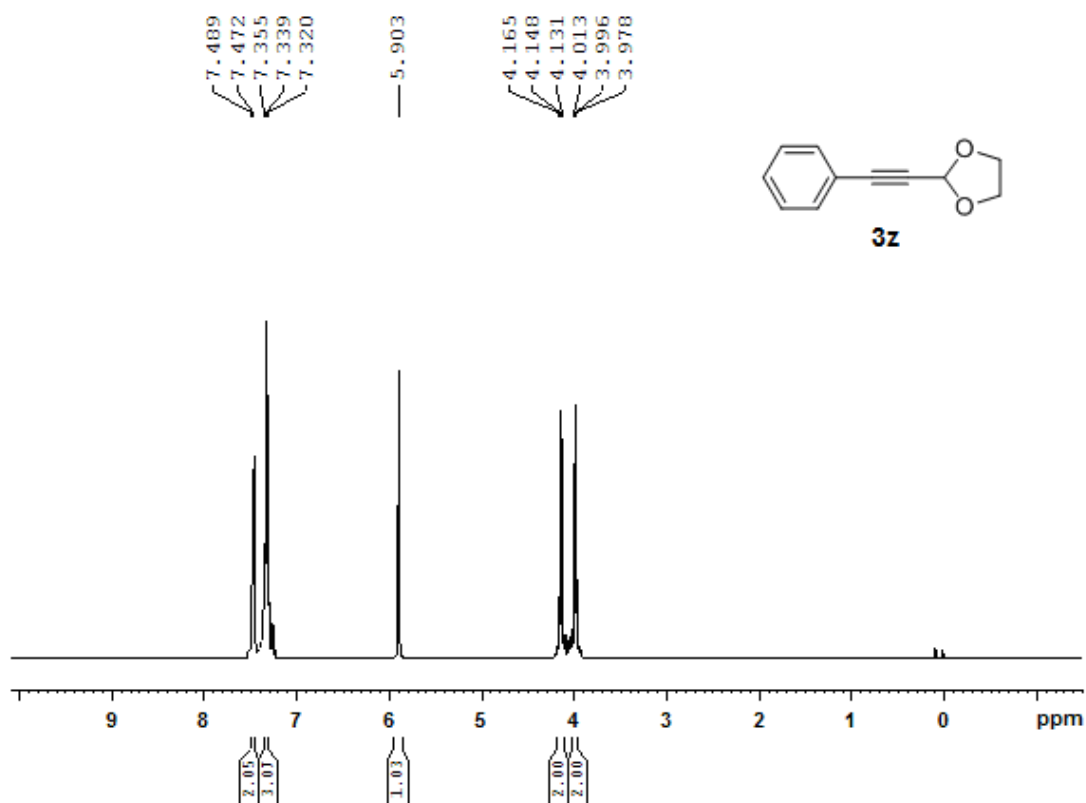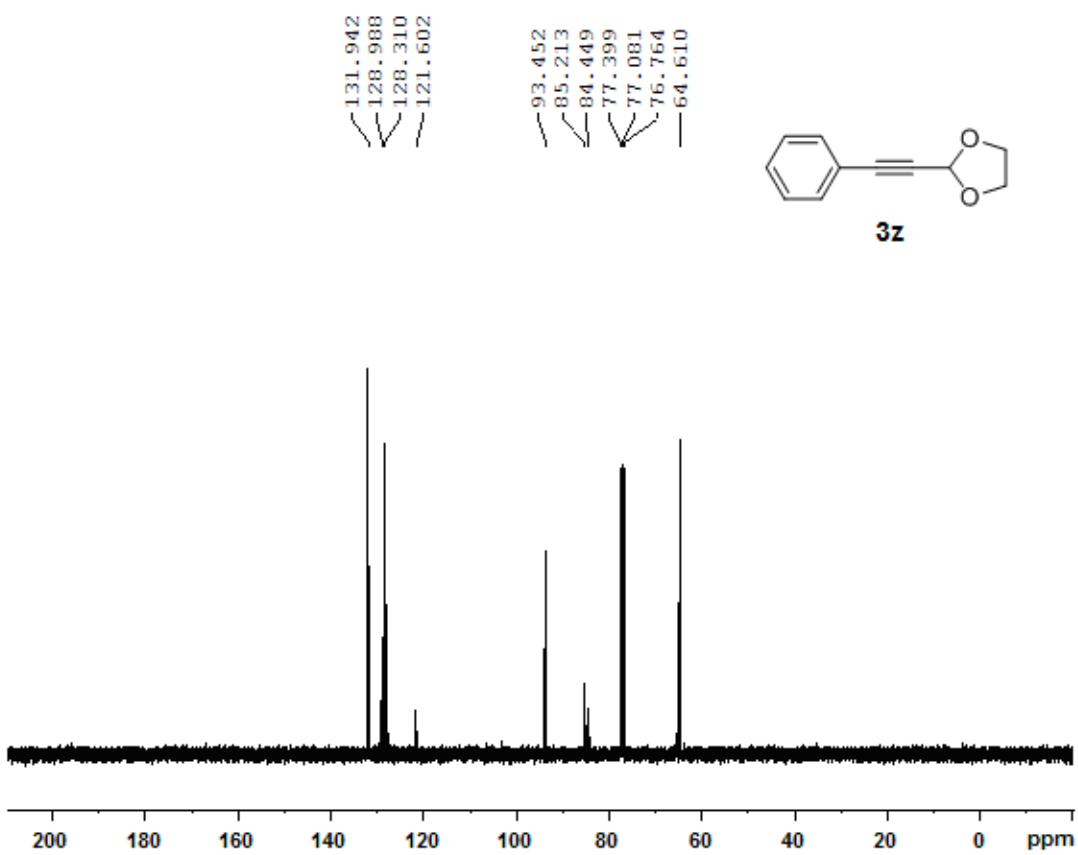

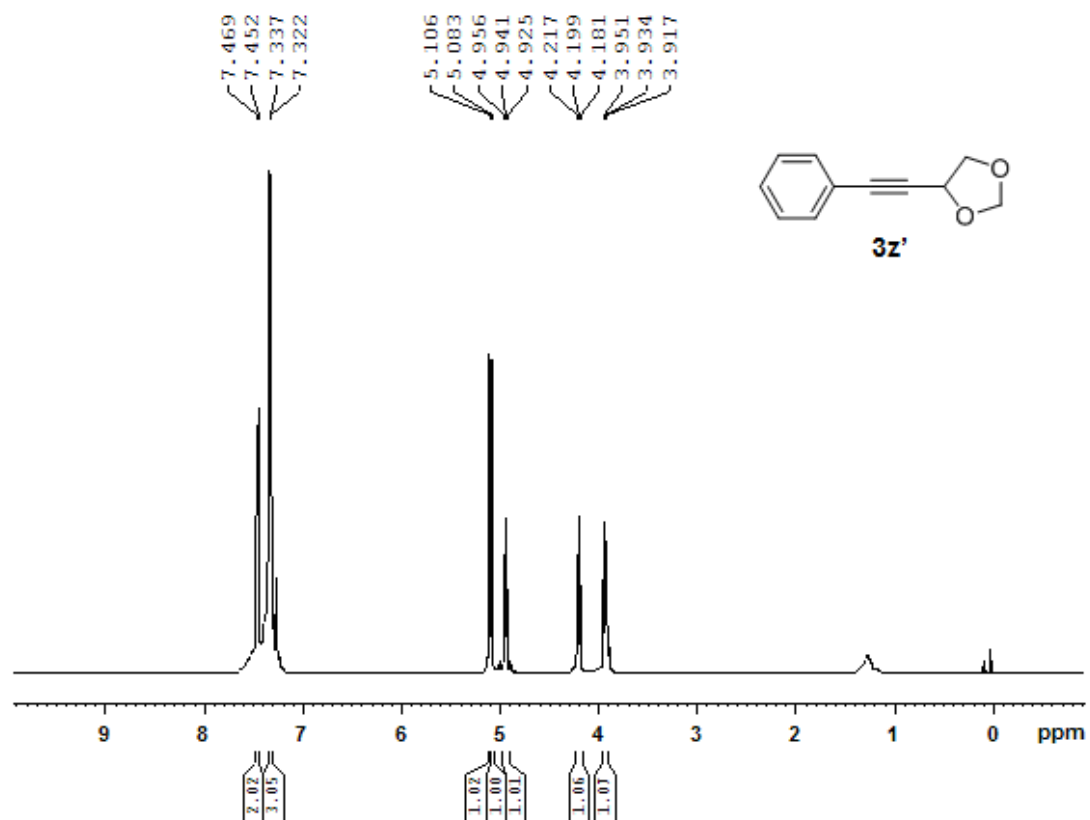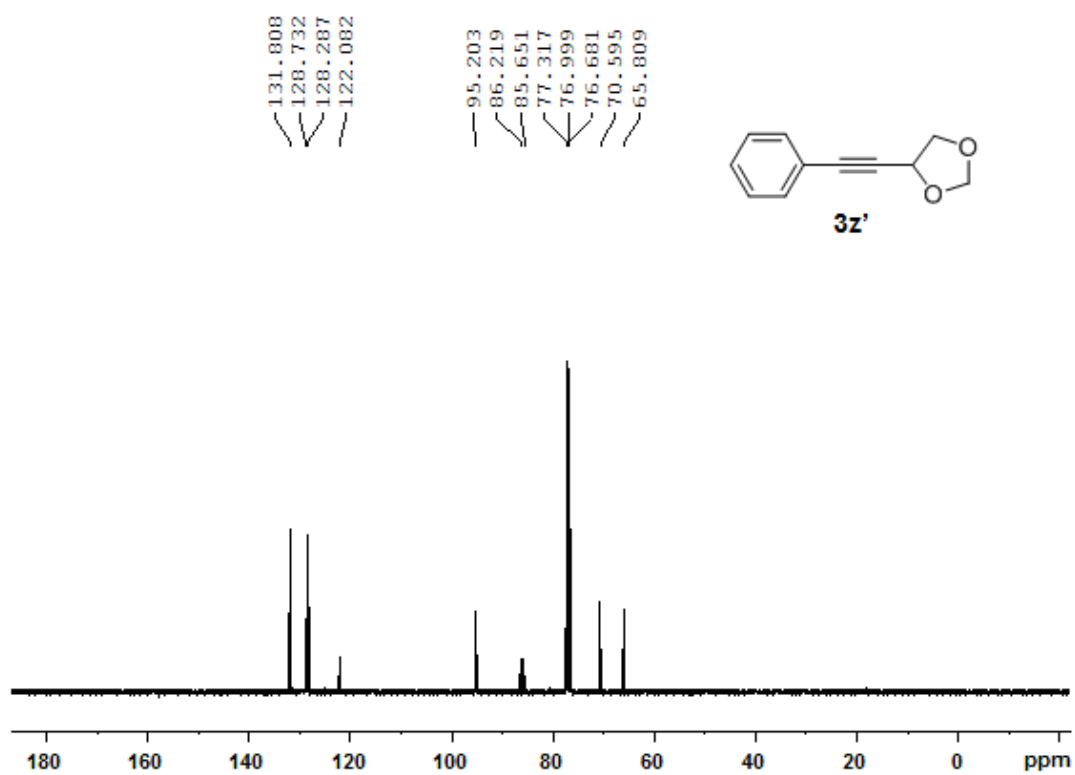

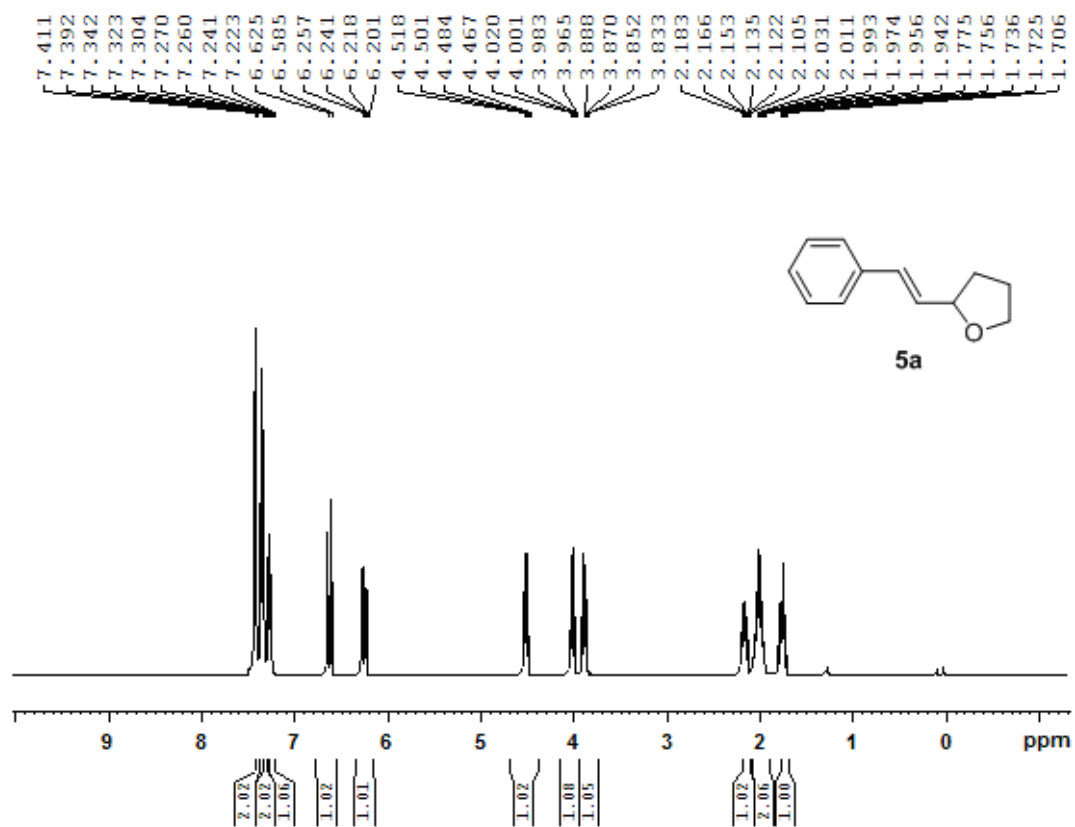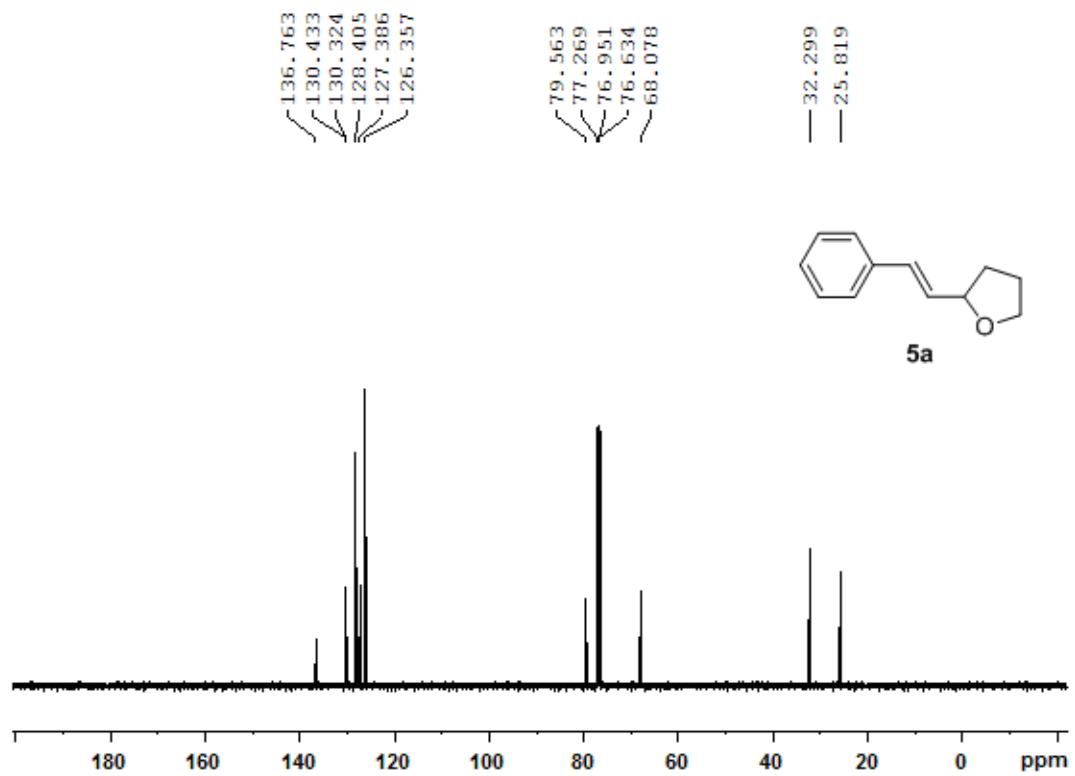

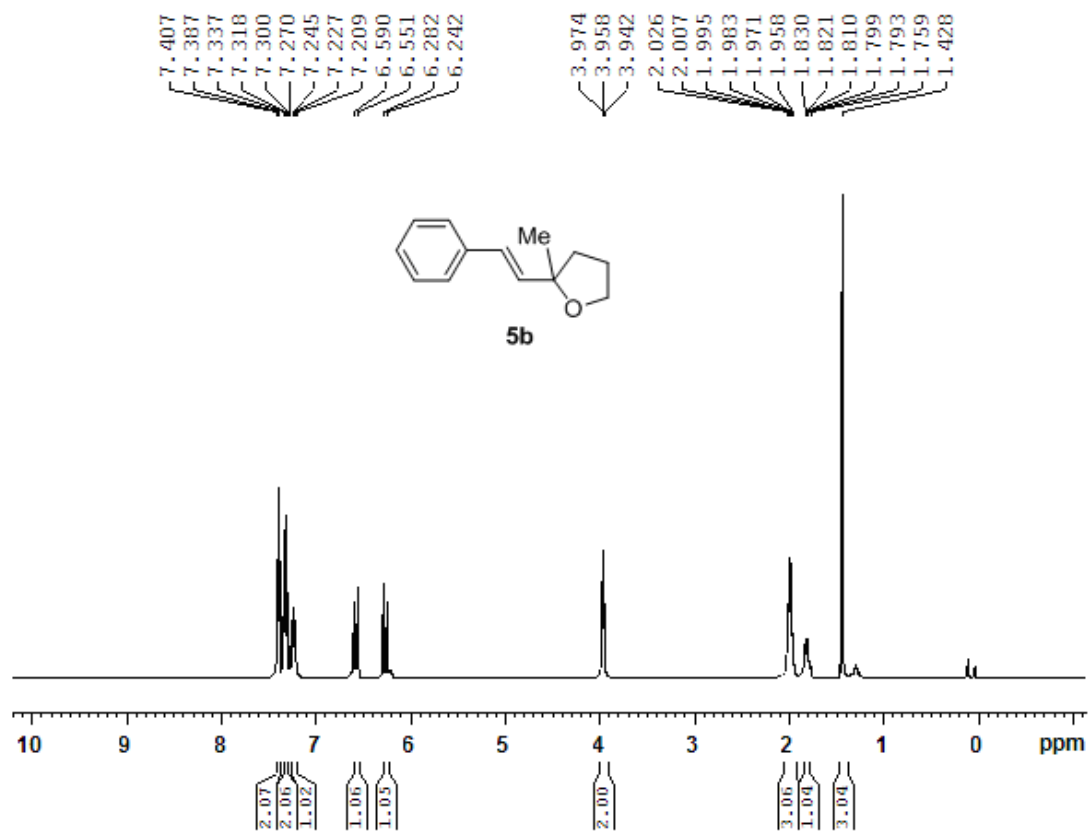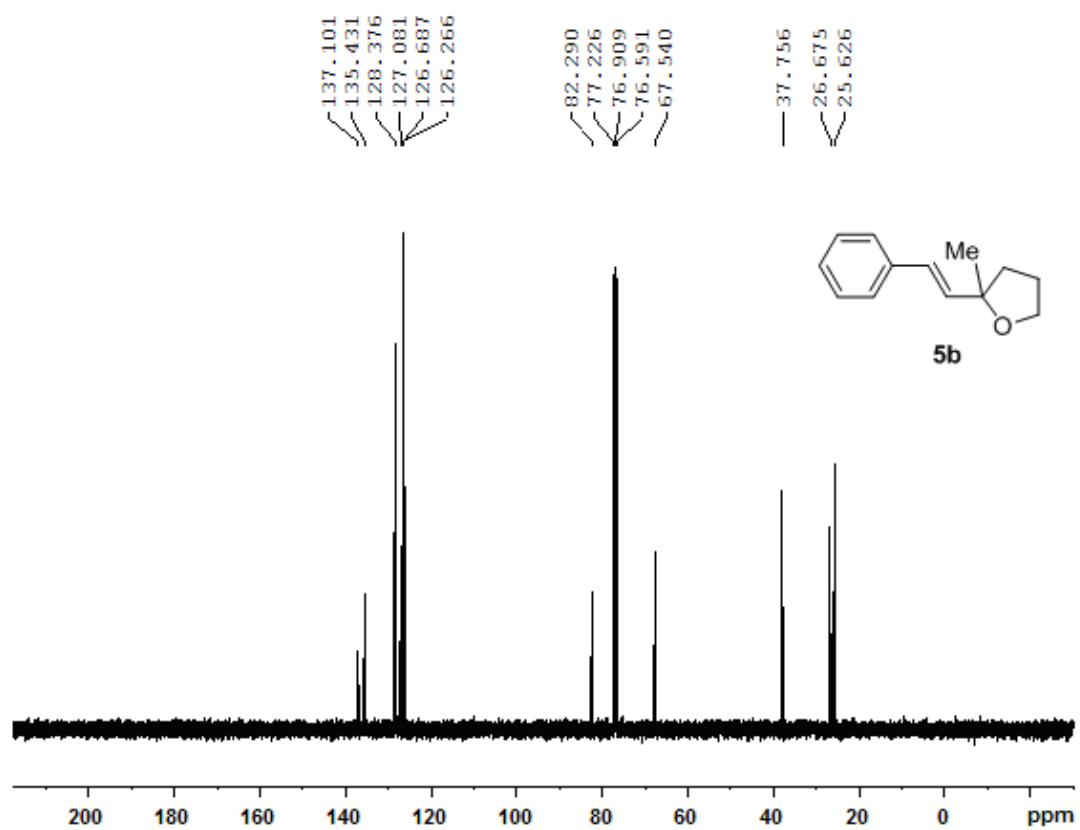



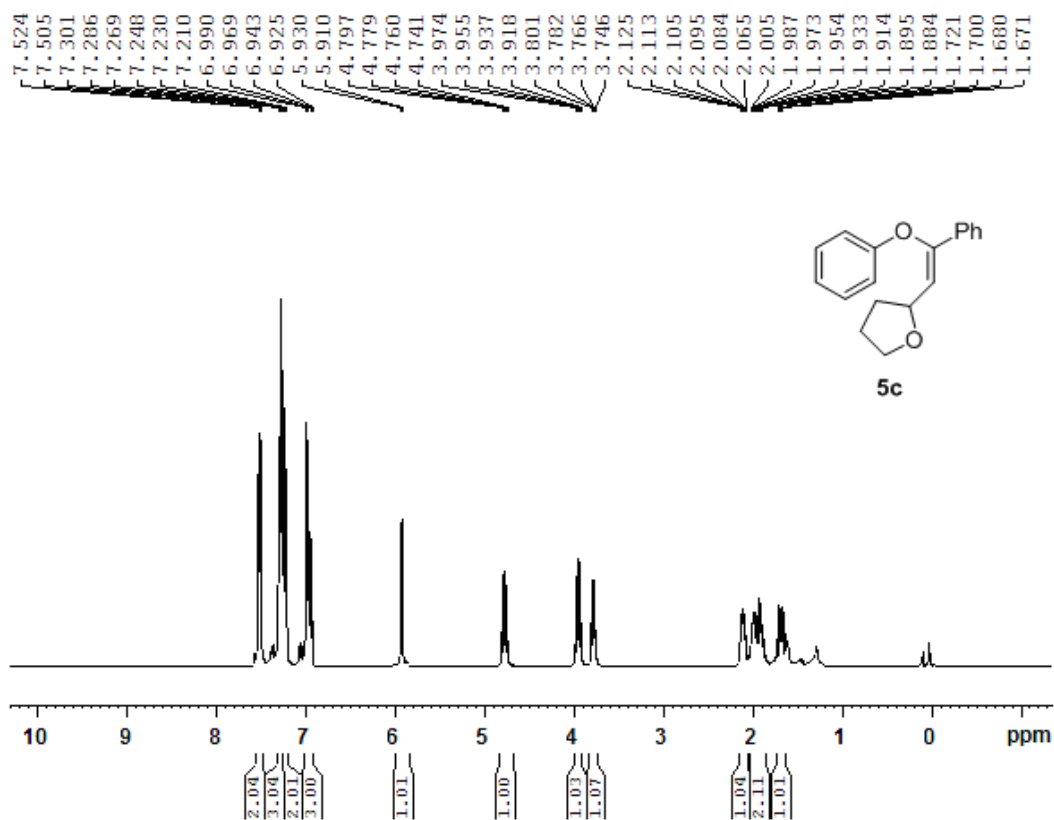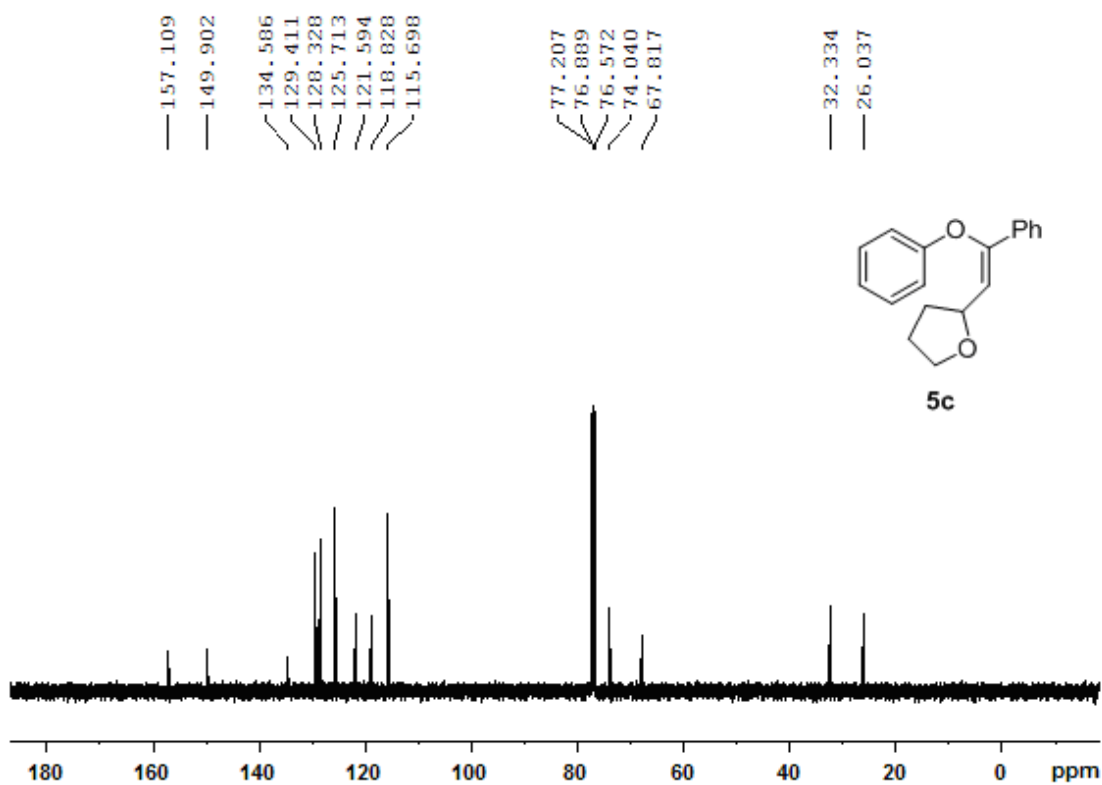

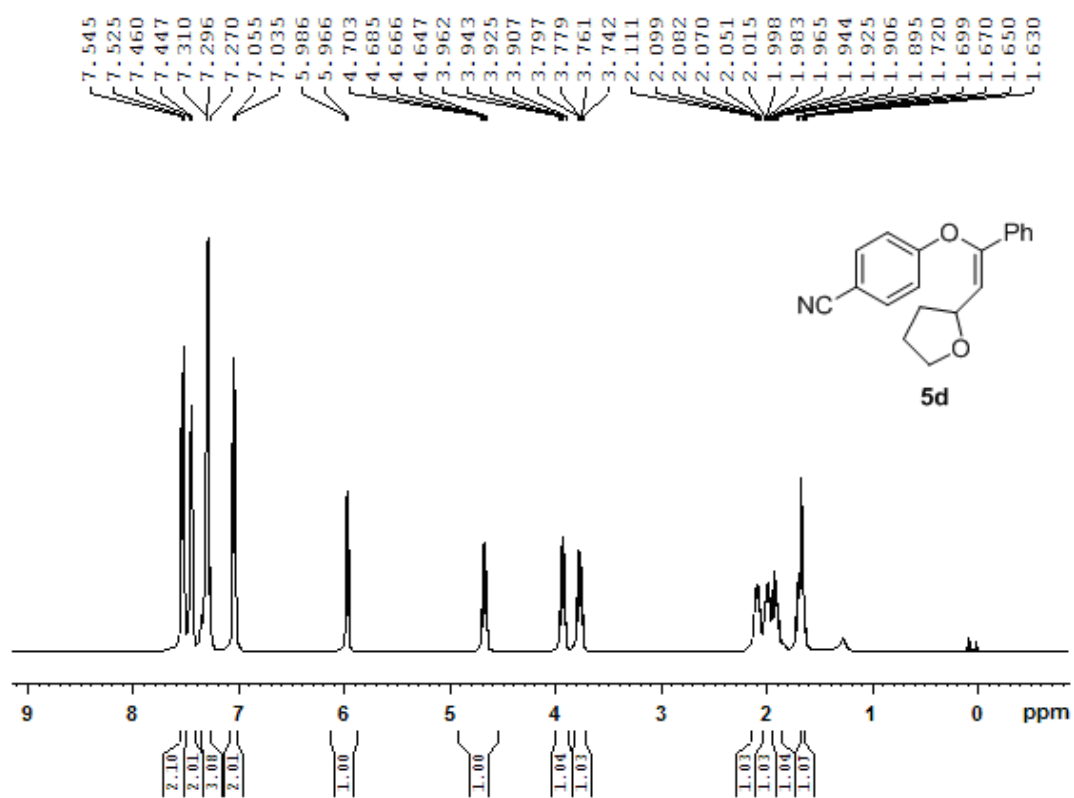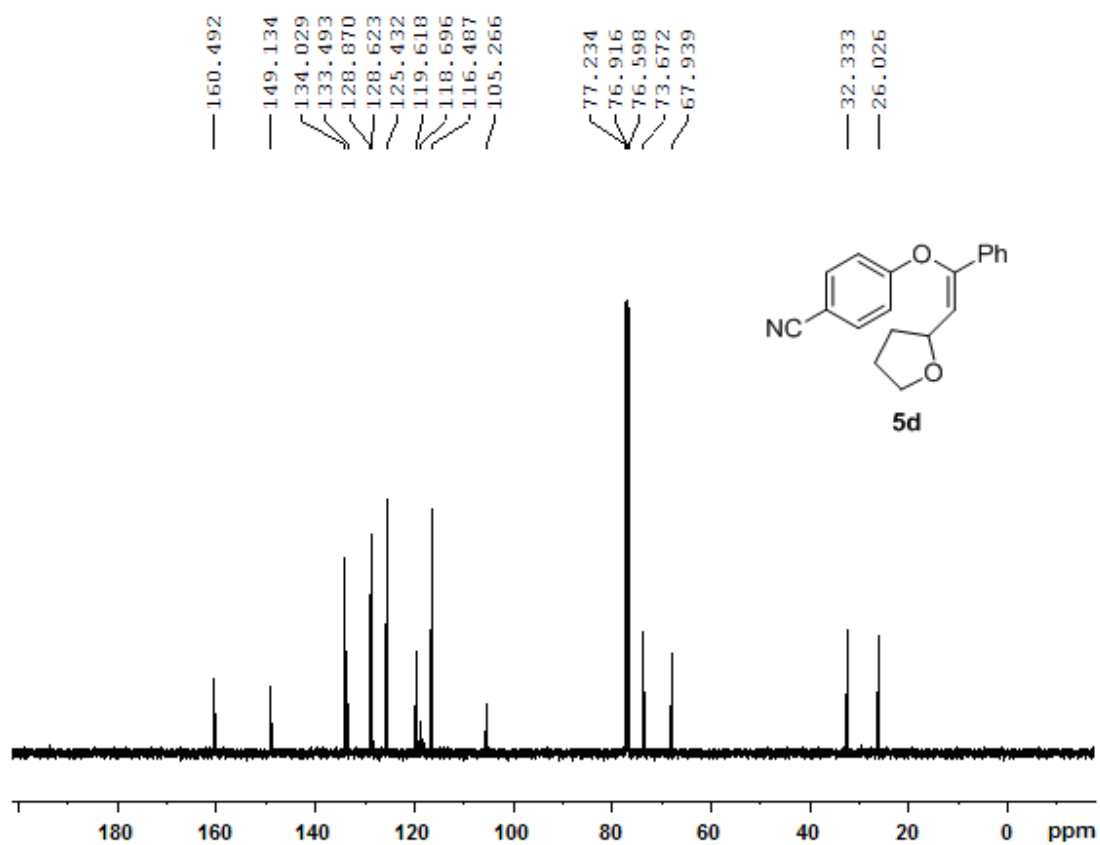

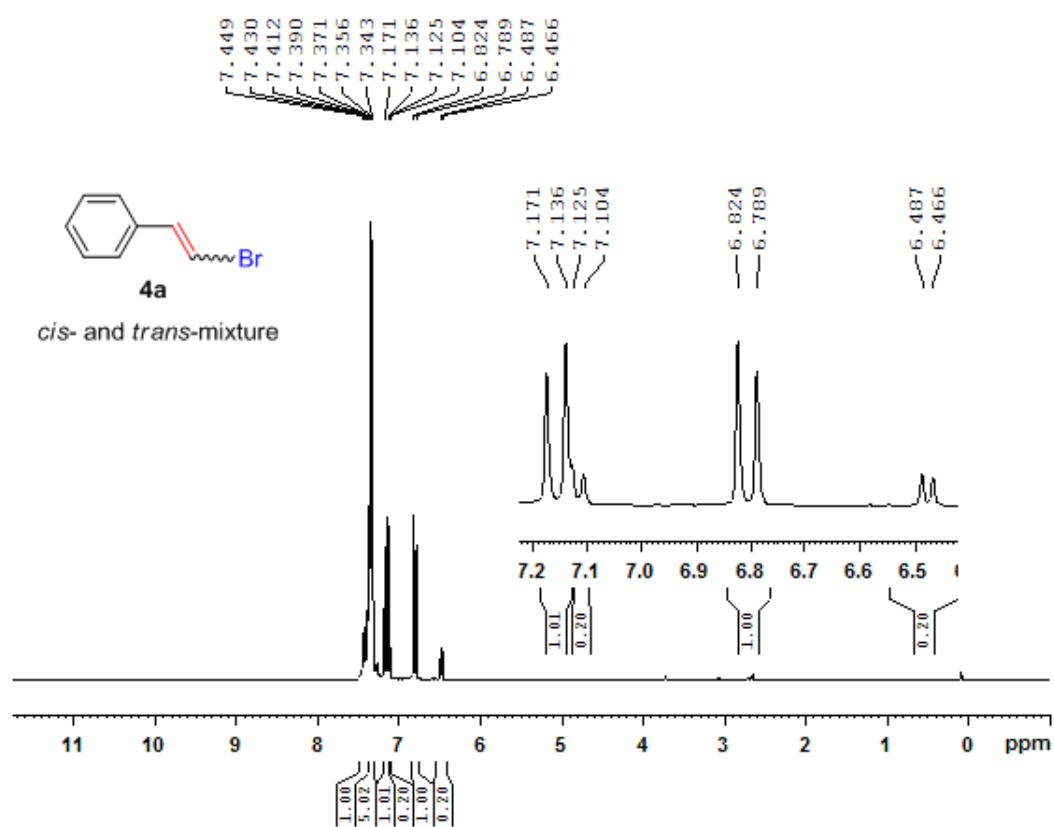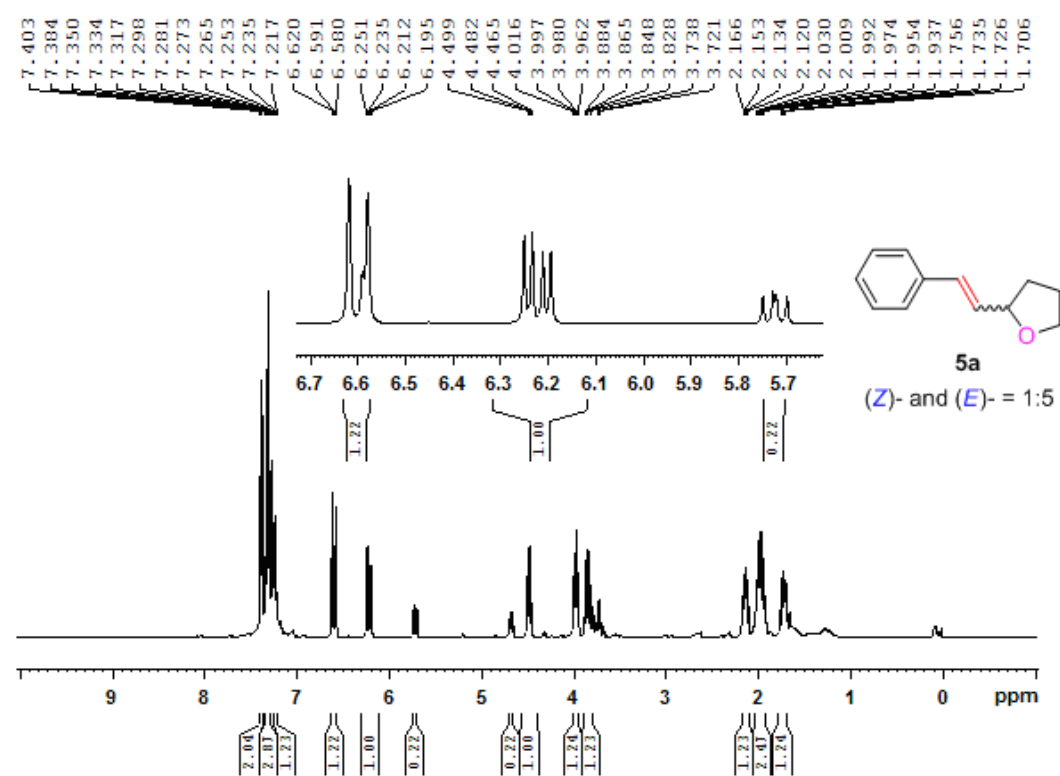

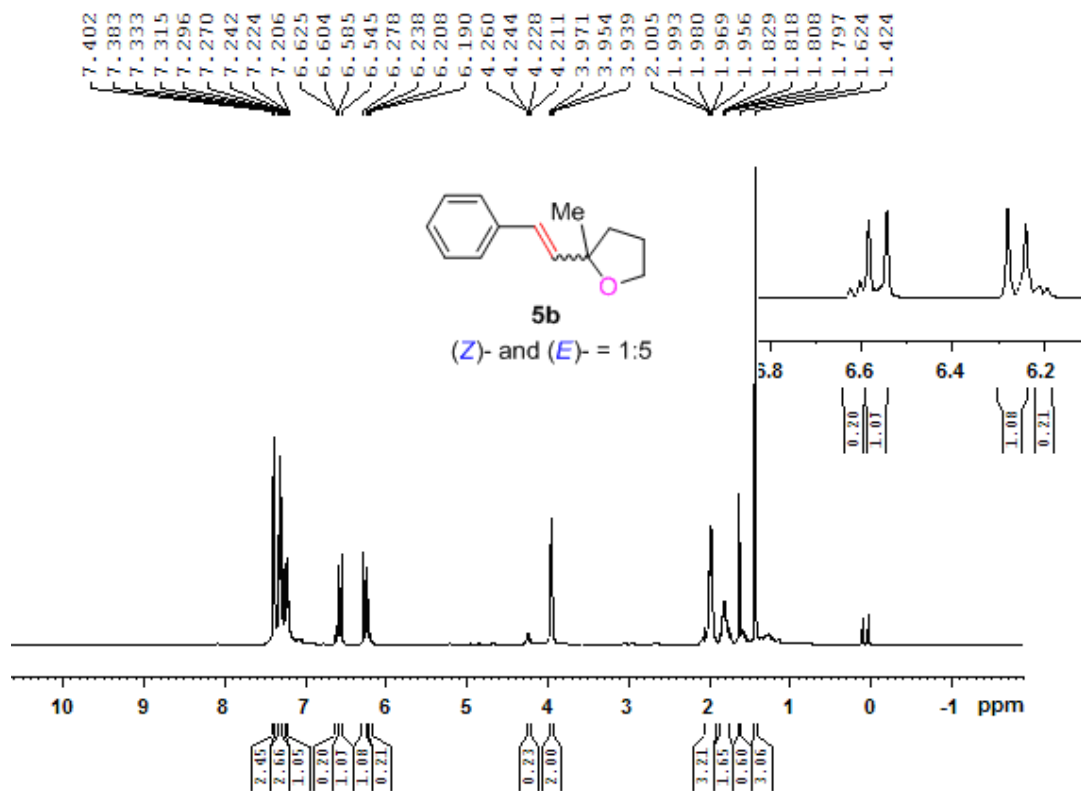

Supplement: c4ob00002a1.pdf [file c4ob00002a1.pdf]
